# Supplementary material for: Effects of changes in eating speed on obesity in patients with diabetes: a secondary analysis of longitudinal health check-up data
Source: PubMed Central journal article supplement — BMJ Open. 2018 Feb 12;8(1):e019589. doi: 10.1136/bmjopen-2017-019589 (PMC5855475; doi:10.1136/bmjopen-2017-019589), 2018-02-12
Supplement: bmjopen-2017-019589.draft_revisions.pdf [file bmjopen-2017-019589.draft_revisions.pdf]

# BMJ Open

BMJ Open is committed to open peer review. As part of this commitment we make the peer review history of every article we publish publicly available.

When an article is published we post the peer reviewers' comments and the authors' responses online. We also post the versions of the paper that were used during peer review. These are the versions that the peer review comments apply to.

The versions of the paper that follow are the versions that were submitted during the peer review process. They are not the versions of record or the final published versions. They should not be cited or distributed as the published version of this manuscript.

BMJ Open is an open access journal and the full, final, typeset and author-corrected version of record of the manuscript is available on our site with no access controls, subscription charges or pay-per-view fees (<http://bmjopen.bmj.com>).

If you have any questions on BMJ Open's open peer review process please email [editorial.bmjopen@bmj.com](mailto:editorial.bmjopen@bmj.com)

# BMJ Open

## The effects of changes in eating speed on obesity

|                                 |                                                                                                                                                                                    |
|---------------------------------|------------------------------------------------------------------------------------------------------------------------------------------------------------------------------------|
| Journal:                        | <i>BMJ Open</i>                                                                                                                                                                    |
| Manuscript ID                   | bmjopen-2017-019589                                                                                                                                                                |
| Article Type:                   | Research                                                                                                                                                                           |
| Date Submitted by the Author:   | 14-Sep-2017                                                                                                                                                                        |
| Complete List of Authors:       | Hurst, Yumi; Kyushu University, Department of Health Care Administration and Management<br>Fukuda , H ; Kyushu University, Department of Health Care Administration and Management |
| <b>Primary Subject Heading</b>: | Public health                                                                                                                                                                      |
| Secondary Subject Heading:      | Epidemiology                                                                                                                                                                       |
| Keywords:                       | PUBLIC HEALTH, obesity, Body mass index, eating habits, health checkups                                                                                                            |
|                                 |                                                                                                                                                                                    |

SCHOLARONE™  
Manuscripts

Peer Review Only

1  
2  
3  
4  
5  
6  
7  
8  
9  
10  
11  
12  
13  
14  
15  
16  
17  
18  
19  
20  
21  
22  
23  
24  
25  
26  
27  
28  
29  
30  
31  
32  
33  
34  
35  
36  
37  
38  
39  
40  
41  
42  
43  
44  
45  
46  
47  
48  
49  
50  
51  
52  
53  
54  
55  
56  
57  
58  
59  
60

**The effects of changes in eating speed on obesity**

**Hurst Y, Fukuda H.**

Department of Health Care Administration and Management,  
Kyushu University Graduate School of Medical Sciences  
3-1-1, Maidashi, Higashi-ku, Fukuoka, 812-8582, Japan

***Corresponding Author***

**Haruhisa Fukuda, MPH, PhD**

*Department of Health Care Administration and Management, Kyushu  
University Graduate School of Medical Sciences  
3-1-1 Maidashi Higashi-ku Fukuoka 812-8582, Japan  
Phone: +81-92-642-6956 Fax: +81-92-642-6961  
Email address: h\_fukuda@hcam.med.kyushu-u.ac.jp*

1  
2  
3 **Abstract**

4 **Objective** Few studies have examined the causal relationships between lifestyle  
5 habits and obesity. With a focus on eating speed, this study aimed to analyze the  
6 effects of changes in lifestyle habits on changes in obesity utilizing panel data.  
7  
8

9  
10 **Methods** Patient-level panel data from 2008 to 2013 were generated using  
11 commercially available insurance claims data and health checkup data. The study  
12 subjects comprised Japanese men and women (n=59,717) enrolled in health insurance  
13 societies who had been diagnosed with type 2 diabetes during the study period. Body  
14 mass index (BMI) was measured, and obesity was defined as a BMI of 25 or more.  
15 Information on lifestyle habits were obtained from the subjects' responses to  
16 questions asked during health checkups. The main exposure of interest was eating  
17 speed ("fast", "normal", and "slow"). Other lifestyle habits included eating dinner  
18 within 2 hours of sleeping, after-dinner snacking, skipping breakfast, alcohol  
19 consumption frequency, sleep adequacy, and tobacco consumption. A generalized  
20 estimating equation model and fixed-effects model were used to examine the effects  
21 of these habits on obesity and BMI, respectively.  
22  
23

24 **Results** The generalized estimating equation model showed that eating slower  
25 inhibited the development of obesity. The odds ratios for slow (0.56) and normal-  
26 speed eaters (0.70) indicated that these groups were less likely to be obese than fast  
27 eaters ( $P < 0.001$ ). Similarly, the fixed-effects model showed that eating slower  
28 reduced BMIs. Relative to fast eaters, the coefficients for slow and normal-speed  
29 eaters were -0.11 and -0.07, respectively ( $P < 0.001$ ).  
30  
31

32 **Discussion** Changes in eating speed can affect changes in obesity and BMI.  
33 Interventions aimed at reducing eating speed may be effective in preventing obesity  
34 and lowering the associated health risks.  
35  
36

37  
38  
39  
40  
41  
42  
43  
44  
45  
46 **Keywords:** Body mass index, obesity, eating habits, health checkups  
47

1  
2  
3 48 **Strengths and limitations of this study**

4  
5 49 1. This is the first long-term panel data analysis to verify the effects of changes in  
6  
7 50 eating habits on obesity.

8  
9 51 2. The large-scale study sample consisted of approximately 60,000 young to middle-  
10  
11 52 aged subjects.

12  
13 53 3. The analysis also examined alcohol consumption, sleep adequacy, and tobacco  
14  
15 54 consumption.

16  
17 55 4. Lifestyle habits were self-assessed and may therefore be vulnerable to reporting  
18  
19 56 bias.

20  
21 57 5. The sample comprised relatively health-conscious individuals who voluntarily  
22  
23 58 participated in health checkups, and the findings may therefore have limited  
24  
25 59 applicability to less health-conscious people.

26  
27 60

28  
29 61 **Funding Statement:**

30  
31 62 This work was supported by Grant-in-Aid for Health Sciences Research by the  
32  
33 63 Ministry of Health, Labour and Welfare of Japan (Grant Number H29-Seisaku-Shitei-  
34  
35 64 010)

36  
37 65

38  
39 66 **Competing Interests Statement:**

40  
41 67 No potential conflicts of interest relevant to this article were reported.

42  
43 68

44  
45 69 **Author Contributions:**

46  
47 70 YH contributed to data analysis and interpretation, and drafting of the manuscript. HF  
48  
49 71 contributed to the study concept, design, and interpretation, and drafting of the  
50  
51 72 manuscript.

52  
53 73  
54  
55  
56  
57  
58  
59  
60

## 74 Introduction

75 Excess body weight and obesity can lead to an increased risk of developing  
76 noncommunicable diseases such as cardiovascular disease, diabetes, and various  
77 forms of cancer.<sup>1-4</sup> Studies have reported that the regulation of body weight can be  
78 effective in lowering these health risks.<sup>1-4</sup> However, a 10-year longitudinal study of  
79 Japanese men aged 40 to 69 years found that the proportion of overweight and obese  
80 individuals had increased over the study period.<sup>5</sup> In addition, the Japanese  
81 government's *Annual Health, Labour and Welfare Report 2014* noted that the  
82 prevalence of obesity continues to rise, with a substantially higher prevalence among  
83 men in 2012 than in 1982.<sup>6</sup> The report also revealed that obesity prevalence exceeded  
84 30% in men in their 40s and 50s. These figures suggest that current obesity  
85 prevention efforts in Japan may be inadequate.

86 The fundamental cause of excess weight gain is the failure to ensure a balance  
87 between energy intake and energy expenditure.<sup>1</sup> However, recent studies have  
88 reported that excess weight gain and metabolic syndrome are affected not only by  
89 energy intake, but are also influenced by other factors such as eating speed, eating  
90 frequency, and other lifestyle habits.<sup>7-10</sup> In addition to emphasizing the importance of  
91 balancing energy intake and expenditure, these other factors represent possible targets  
92 for obesity prevention measures.

93 In response to the rising prevalence of obesity, Japan's Ministry of Health,  
94 Labour and Welfare introduced a nationwide health screening program (Standard  
95 Health Checkup and Counseling Guidance Program) to detect risk factors for obesity  
96 and metabolic syndrome.<sup>11,12</sup> Under this program, insurers conduct "specific health  
97 checkups" aimed at insurance enrollees aged 40 years or older. However, participation  
98 in these checkups is not mandatory.

99 Although many studies have addressed the associations between lifestyle habits  
100 and obesity, few have examined the causal effects of changes in lifestyle habits on  
101 obesity. The main objective of this study was to utilize panel data to analyze the

1  
2  
3 102 effects of changes in eating speed and other lifestyle habits on obesity.  
4  
5 103  
6

7 104 **Methods**

8  
9 105 **Data source**

10  
11 106 This study used a commercial database obtained from the Japan Medical Data Center  
12  
13 107 (JMDC), a for-profit organization that collects, curates, and distributes health-related  
14  
15 108 data. The database comprised insurance claims data and health checkup data for  
16  
17 109 insurance enrollees and their dependents that were collected through JMDC's  
18  
19 110 contracts with several health insurance societies. The claims data included  
20  
21 111 information on the dates of consultations and treatments, sex, age, diagnoses, specific  
22  
23 112 treatments, and healthcare expenditure. The health checkup data included the dates of  
24  
25 113 checkups, body mass index (BMI), blood pressure, and the results of blood chemical  
26  
27 114 analysis, liver function test, blood glucose test, and urinalysis. The health checkup  
28  
29 115 data also included the subjects' responses to several questions regarding lifestyle  
30  
31 116 factors, such as eating habits, alcohol consumption, tobacco use, and sleeping  
32  
33 117 habits.<sup>12</sup> The claims data and health checkup data were linked at the individual  
34  
35 118 subject level for analysis.  
36  
37 119

38  
39 120 **Study design**

40  
41 121 We first identified subjects with at least one recorded diagnosis of type 2 diabetes in  
42  
43 122 their claims data from January 2005 to June 2013. Both the claims data and health  
44  
45 123 checkup data from this study period were used in the analysis. From the claims data,  
46  
47 124 we obtained information on subject sex, age, and the starting date of anti-diabetic  
48  
49 125 medication. The claims data were linked with the health checkup data at the patient-  
50  
51 126 month level to generate panel data. We excluded subjects with missing data for BMI  
52  
53 127 and lifestyle habits. The results from each subject's first specific health checkup  
54  
55 128 during the study period were used as the baseline values.  
56  
57 129

1  
2  
3 130 **Outcomes**

4  
5 131 The primary outcome of this study was obesity status. According to the World Health  
6  
7 132 Organization's criteria, a BMI of 25 or more indicates that a person is overweight,  
8  
9 133 and a BMI of 30 or more indicates obesity. However, it has been proposed that these  
10  
11 134 BMI cut-off points should be lower for Asian populations.<sup>13</sup> The Japan Society for the  
12  
13 135 Study of Obesity has recommended that obesity be defined by a BMI of 25 or more  
14  
15 136 for the Japanese population.<sup>14</sup> In accordance with this recommendation, our study  
16  
17 137 uses a BMI cut-off point of 25 to identify obese individuals. The secondary outcome  
18  
19 138 of this study was BMI, which was analyzed as a continuous variable.  
20

21 139

22  
23 140 **Exposure variables**

24  
25 141 The exposure variables consisted of the 7 question items regarding lifestyle habits.  
26  
27 142 The main exposure of interest was eating speed. The other items were eating dinner  
28  
29 143 within 2 hours before sleeping for 3 times or more per week, snacking after dinner for  
30  
31 144 3 times or more per week, skipping breakfast 3 times or more per week, alcohol  
32  
33 145 consumption frequency, sleep adequacy, and habitual smoking. These variables were  
34  
35 146 analyzed as categorical variables based on the response options. Eating speed was  
36  
37 147 analyzed as 3 categories ("fast", "normal", and "slow"). Eating dinner within 2 hours  
38  
39 148 before sleeping for 3 times or more per week, snacking after dinner for 3 times or  
40  
41 149 more per week, skipping breakfast 3 times or more per week, adequate sleep, and  
42  
43 150 habitual smoking were analyzed as 2 categories ("yes" and "no"). Alcohol  
44  
45 151 consumption frequency was analyzed as 3 categories ("every day", "occasionally",  
46  
47 152 and "rarely or never").  
48

49 153

50  
51 154 **Covariates**

52  
53 155 The covariates were selected from factors thought to influence lifestyle habits and  
54  
55 156 weight management. These included the use of anti-diabetic medication (as an  
56  
57 157 indicator of diabetes that requires pharmacologic treatment), age, as well as obesity  
58  
59  
60



1  
2  
3 158 status and BMI in the previous checkup. The use or non-use of anti-diabetic  
4  
5 159 medication was determined based on whether the patient had been administered anti-  
6  
7 160 diabetic medication at the time of each health checkup. This variable was analyzed as  
8  
9 161 2 categories (“yes” and “no”). In addition to human insulin preparations and insulin  
10  
11 162 analogs, anti-diabetic medications also included sulfonylureas, biguanide derivatives,  
12  
13 163 glitazones,  $\alpha$ -glucosidase inhibitors, glinides, DPP-4 inhibitors, and GLP-1 receptor  
14  
15 164 agonists. Age and BMI in the previous checkup were analyzed as continuous variables.  
16  
17 165 Obesity status in the previous checkup was analyzed as 2 categories (“yes” for BMI  
18  
19 166  $\geq 25$  and “no” for BMI  $< 25$ ).

20  
21 167

### 22 23 168 **Statistical analysis**

24  
25 169 The subject baseline characteristics of sex, age, BMI, obesity status, and lifestyle  
26  
27 170 habits were compared among the 3 eating speed categories using the  $\chi^2$  test or one-  
28  
29 171 way analysis of variance. Patient-level panel data were generated using repeated  
30  
31 172 estimates from multiple health checkups. We constructed a generalized estimating  
32  
33 173 equation model to elucidate the effects of changes in eating speed on obesity. The  
34  
35 174 dependent variable was obesity status. The exposure variables were the 7 lifestyle  
36  
37 175 habit items, and the covariates were the use of anti-diabetic medication, age, and  
38  
39 176 obesity status in the previous checkup.

40  
41 177 In order to estimate the influence of changes in eating speed on BMI, we  
42  
43 178 utilized a fixed-effects model where the dependent variable was BMI. The exposure  
44  
45 179 variables were the 7 lifestyle habit items, and the covariates were the use of anti-  
46  
47 180 diabetic medication, age, and BMI in the previous checkup. The Hausman test was  
48  
49 181 employed for model selection.

50  
51 182 All statistical analyses were conducted using Stata 13.1 (Stata Corp., College  
52  
53 183 Station, TX, USA). Statistical significance was set at  $P < 0.05$ .

54  
55 184  
56  
57  
58  
59  
60

1  
2  
3 185 **Results**

4  
5 186 We identified 92,363 individuals from 303,361 person-months who had been  
6  
7 187 diagnosed with type 2 diabetes and had health checkup data for the period between  
8  
9 188 January 2005 and June 2013. After excluding cases with missing data in BMI and the  
10  
11 189 lifestyle habit items, the sample for analysis comprised 59,717 individuals from  
12  
13 190 129,978 person-months. The claims data and health checkup data that could be linked  
14  
15 191 for analysis covered the period from February 2008 to June 2013.

16  
17 192 The distribution of baseline characteristics according to eating speed is  
18  
19 193 presented in Table 1. The slow-eating group had a significantly higher proportion of  
20  
21 194 women (44.4%), lower mean BMI ( $22.3 \pm 4.0$ ), lower proportion of obese individuals  
22  
23 195 (21.5%), lower alcohol consumption frequency (every day: 22.8%; occasionally:  
24  
25 196 27.5%; rarely or never: 49.7%), and lower proportion of habitual smokers (27.3%)  
26  
27 197 when compared with the other 2 groups (all:  $P < 0.001$ ). In contrast, the fast-eating  
28  
29 198 group had a significantly lower proportion of women (27.3%,  $P < 0.001$ ), but a  
30  
31 199 significantly higher mean BMI ( $25.0 \pm 4.4$ ,  $P < 0.001$ ) and higher proportion of obese  
32  
33 200 individuals (44.8%,  $P < 0.001$ ).

34  
35 201 Table 2 shows the estimated odds ratios (ORs) of the various determinants of  
36  
37 202 obesity derived from the generalized estimating equation model. All eating habit  
38  
39 203 items, alcohol consumption frequency, sleep adequacy, and obesity status in the  
40  
41 204 previous checkup were significantly associated with obesity. When compared with the  
42  
43 205 fast-eating group, the slower eating speeds were significantly associated with reduced  
44  
45 206 ORs for obesity (normal: 0.70; slow: 0.56;  $P < 0.001$ ). This indicated that slower  
46  
47 207 eating speeds may lead to the alleviation of obesity. The results also showed that  
48  
49 208 reduced alcohol consumption frequency was significantly associated with higher ORs  
50  
51 209 for obesity (occasionally: 1.13,  $P < 0.001$ ; rarely or never: 1.09,  $P = 0.002$ ). In  
52  
53 210 addition, inadequate sleep was significantly associated with a higher OR for obesity  
54  
55 211 (1.05,  $P = 0.023$ ). Habitual smoking and use of anti-diabetic medication were not  
56  
57 212 significantly associated with the outcome.

1  
2  
3 213 The estimated coefficients of the various determinants of changes in BMI are  
4  
5 214 presented in Table 3. Eating speed (normal:  $P < 0.001$ ; slow:  $P < 0.001$ ), eating  
6  
7 215 dinner within 2 hours before sleeping for 3 times or more per week ( $P < 0.001$ ),  
8  
9 216 snacking after dinner for 3 times or more per week ( $P < 0.001$ ), BMI in the previous  
10  
11 217 checkup ( $P < 0.001$ ), alcohol consumption frequency (occasionally:  $P < 0.001$ ; rarely  
12  
13 218 or never:  $P = 0.002$ ), sleep adequacy ( $P < 0.001$ ), and age ( $P = 0.008$ ) were  
14  
15 219 significantly associated with changes in BMI. With the exception of age and BMI in  
16  
17 220 the previous checkup, the coefficients of all the other factors were negative. This  
18  
19 221 indicated that eating slower, not eating dinner within 2 hours before sleeping, not  
20  
21 222 snacking after dinner, drinking infrequently, and not obtaining adequate sleep were  
22  
23 223 associated with reductions in BMI. Skipping breakfast 3 times or more per week,  
24  
25 224 habitual smoking, and the use of anti-diabetic medication were not significantly  
26  
27 225 associated with BMI.

226

## 227 **Discussion**

228 This study analyzed Japanese men and women who had undergone specific health  
229 checkups regardless of obesity status. Possible lifestyle-related determinants of  
230 obesity were identified using questionnaire items from the Standard Health Checkup  
231 and Counseling Guidance Program.<sup>12</sup> We examined 6-year panel data to determine  
232 how changes in eating speed and other lifestyle habits affect obesity and BMI. The  
233 main results indicated that decreases in eating speeds can lead to reductions in  
234 obesity and BMI after controlling for the covariates. In addition, the study found that  
235 the cessation of eating after dinner or within 2 hours before sleeping would also have  
236 a similar effect on reducing excess body weight.

237 The use of panel data increases the accuracy of estimates with substantial  
238 increases in the variable of interest when compared with conventional cross-sectional  
239 and time series data.<sup>15</sup> Panel data also enable adjustments of the unobservable  
240 differences between study subpopulations, thereby facilitating analyses of the effects

1  
2  
3 241 of behavioral changes in subjects.

4  
5 242 The major finding of this study is that changes in eating speed affect obesity  
6  
7 243 and BMI. The control of eating speed may therefore be a possible means of regulating  
8  
9 244 body weight and preventing obesity, which in turn reduces the risk of developing  
10  
11 245 noncommunicable diseases. Eating quickly is associated with impaired glucose  
12  
13 246 tolerance and insulin resistance,<sup>16,17</sup> and is a known risk factor for diabetes through  
14  
15 247 increases in body weight.<sup>18</sup> Other studies have also reported associations between  
16  
17 248 eating quickly and increased BMI, indicating that eating speed is a contributing factor  
18  
19 249 for obesity.<sup>7,8,19-24</sup> A possible reason for this association is that fast eaters may  
20  
21 250 continue to eat until they feel full despite having already consumed an adequate  
22  
23 251 amount of calories, and the combined effect of eating quickly and overeating may  
24  
25 252 contribute to weight gain.<sup>25</sup> In contrast, eating slowly may help to increase feelings of  
26  
27 253 satiety before an excessive amount of food is ingested.<sup>26-28</sup> A prospective study of  
28  
29 254 schoolgirls found that the reduction of eating speed was able to suppress weight gain  
30  
31 255 and prevent obesity.<sup>29</sup> The findings of these studies are consistent with those of our  
32  
33 256 analysis.

34  
35 257 Our results also indicated that frequently eating dinner within 2 hours before  
36  
37 258 sleeping, snacking after dinner, and skipping breakfast contribute to the development  
38  
39 259 of obesity. Previous studies have identified eating after dinner and within 2 hours  
40  
41 260 before sleeping as risk factors of metabolic syndrome.<sup>7</sup> This supports our findings  
42  
43 261 that the cessation of these habits can help to reduce obesity and BMI. Skipping  
44  
45 262 breakfast has also been shown to be associated with excess weight and obesity, and is  
46  
47 263 a risk factor of metabolic syndrome.<sup>7,9,30</sup> Our generalized estimating equation model  
48  
49 264 revealed that consistently eating breakfast can reduce obesity, which also  
50  
51 265 corroborates the findings of previous studies. However, our fixed-effects model  
52  
53 266 showed that consistently eating breakfast did not affect changes in BMI. It has been  
54  
55 267 reported that skipping breakfast over a long-period is associated with high BMI and  
56  
57 268 elevated cardiometabolic risks.<sup>31</sup> Consistently eating breakfast may therefore help to

1  
2  
3 269 control obesity and BMI.

4 270 Daily alcohol consumption has been reported to be positively associated with  
5  
6 271 obesity, and is another risk factor of metabolic syndrome.<sup>7,32</sup> However, our findings  
7  
8 272 indicated that alcohol consumption frequency was not significantly associated with  
9  
10 273 obesity. Previous studies have reported that the frequency of alcohol consumption  
11  
12 274 (given the same quantities of alcohol) was inversely associated with obesity.<sup>33,34</sup> It is  
13  
14 275 possible that the subjects in this study who drank with higher frequency were  
15  
16 276 consuming moderate quantities of alcohol, whereas the subjects who drank  
17  
18 277 infrequently consumed larger quantities during each session.

19  
20  
21 278 Studies have also found associations between short sleep durations and BMI  
22  
23 279 increases, and that poor-quality sleep is associated with metabolic syndrome.<sup>35-37</sup> Our  
24  
25 280 analysis produced contradictory results in that a change from adequate sleep to  
26  
27 281 inadequate sleep would reduce BMI but increase obesity progression. A recent study  
28  
29 282 has shown that unstable sleep patterns may increase the quantity of food intake,<sup>38</sup> and  
30  
31 283 our findings therefore require further investigation. The lack of association between  
32  
33 284 habitual smoking and BMI or metabolic syndrome has been reported in previous  
34  
35 285 studies,<sup>7,39</sup> which corroborates our findings.

36  
37 286 This study has several limitations that should be considered. First, this study  
38  
39 287 utilized health checkup data from health insurance societies. As a result, the data may  
40  
41 288 not have included a large proportion of the insurance enrollees' dependents. In  
42  
43 289 particular, there was a relatively small proportion of older adults in our study  
44  
45 290 population. The results may therefore lack generalizability to other subpopulations.  
46  
47 291 Second, eating speed and the other lifestyle habits were self-assessed, and may  
48  
49 292 therefore be vulnerable to reporting bias. However, while the differences in  
50  
51 293 perceptions of eating and sleeping habits in standardized questionnaires have been  
52  
53 294 described,<sup>41</sup> Sasaki *et al.* reported that there was no difference between the eating  
54  
55 295 speeds assessed by study subjects or by friends of the subjects.<sup>23</sup> In addition, our  
56  
57 296 findings are consistent with those of a previous study that used objective measures of  
58  
59  
60

1  
2  
3 297 eating speed and found that slower eating speeds were associated with greater weight  
4  
5 298 loss.<sup>28</sup> Thirdly, we did not include an analysis of physical exercise. Nevertheless, a  
6  
7 299 previous analysis has reported that eating speed was associated with obesity  
8  
9 300 regardless of the level of physical activity.<sup>24</sup> In addition, other studies have reported  
10  
11 301 similar associations between eating speed and BMI given similar overall food intake,  
12  
13 302 which corroborates our findings.<sup>22,23</sup> Finally, the sample comprised relatively health-  
14  
15 303 conscious individuals who voluntarily participated in health checkups. The findings  
16  
17 304 may therefore have limited applicability to less health-conscious people.

18  
19 305 Many studies have shown that eating habits are associated with BMI and weight  
20  
21 306 gain.<sup>7,8,16-29</sup> However, this study utilized panel data to show that changes in eating  
22  
23 307 habits have a causal relationship with obesity and BMI. These findings indicate that  
24  
25 308 weight loss can be supported through the reduction of eating speed, the cessation of  
26  
27 309 eating dinner within 2 hours before sleeping, the cessation of snacking after dinner,  
28  
29 310 and consistently having breakfast.

30  
31 311

### 32 33 312 **Conclusions**

34  
35 313 Changes in eating habits can affect obesity and BMI. Interventions aimed at altering  
36  
37 314 eating habits, such as education initiatives and programs to reduce eating speed, may  
38  
39 315 be useful in preventing obesity and reducing the risk of noncommunicable diseases.

40  
41 316  
42  
43  
44  
45  
46  
47  
48  
49  
50  
51  
52  
53  
54  
55  
56  
57  
58  
59  
60

317 **References**

- 318 1. World Health Organization. Media centre, obesity and overweight.  
319 <http://www.who.int/mediacentre/factsheets/fs311/en/> [Accessed: August 19, 2017]
- 320 2. Oh SW, Shin SA, Yun YH, *et al.* Cut-off point of BMI and obesity-related  
321 comorbidities and mortality in middle-aged Koreans. *Obes Res* 2004; 12: 2031-40.
- 322 3. Yoon KH, Lee JH, Kim JW, *et al.* Epidemic obesity and type 2 diabetes in Asia,  
323 *Lancet* 2006; 368: 1681-8.
- 324 4. Huxley R, Mendis S, Zheleznyakov E, *et al.* Body mass index, waist circumference  
325 and waist:hip ratio as predictors of cardiovascular risk. *Eur J Clin Nutr* 2010; 64:  
326 16-22.
- 327 5. Matsushita Y, Takahashi Y, Mizoue T, *et al.* Overweight and obesity trends among  
328 Japanese adults: a 10-year follow-up of the JPHC Study. *Int J Obes* 2008; 32: 1861-7.
- 329 6. Ministry of Health, Labour and Welfare. Annual Health, Labour and Welfare Report  
330 2013-2014. Toward the Realization of a Society of Health and Longevity: The First  
331 Year of Health and Prevention.  
332 <http://www.mhlw.go.jp/wp/hakusyo/kousei/14/backdata/> [Accessed: August 19, 2017]
- 333 7. Ashizawa E, Katano S, Harada A, *et al.* Exploring the link between standard lifestyle  
334 questionnaires administered during specific medical check-ups and incidence of  
335 metabolic syndrome in Chiba Prefecture. *Nihon Koshu Eisei Zasshi* 2014; 61(4): 176-  
336 85.
- 337 8. Zhu B, Haruyama Y, Muto T, *et al.* Association Between Eating Speed and Metabolic  
338 Syndrome in a Three-Year Population-Based Cohort Study. *J Epidemiol* 2015; 25:  
339 332-6.
- 340 9. Horikawa C, Kodama S, Yachi Y, *et al.* Skipping breakfast and prevalence of  
341 overweight and obesity in Asian and Pacific regions: A meta-analysis. *Prev Med*  
342 2011; 53: 260-7.
- 343 10. Ferrie JE, Kivimäki M, Akbaraly TN, *et al.* Change in Sleep Duration and Type 2  
344 Diabetes: The Whitehall II Study. *Diabetes Care* 2015; 38: 1467-72.
- 345 11. Tamura T, Kimura Y. Specific health checkups in Japan: The present situation

- 1  
2  
3 346 analyzed using 5-year statistics and the future. *Biomed Eng Lett* 2015; 5: 22-8.
- 4  
5 347 12. Health Service Bureau, the Ministry of Health, Labour and Welfare. Standard Health  
6  
7 348 Checkup and Counseling Guidance Program (Revised Version).  
8  
9 349 [http://www.mhlw.go.jp/stf/seisakunitsuite/bunya/kenkou\\_iryuu/kenkou/seikatsu/](http://www.mhlw.go.jp/stf/seisakunitsuite/bunya/kenkou_iryuu/kenkou/seikatsu/)  
10  
11 350 [Accessed: August 19, 2017]
- 12  
13 351 13. WHO Expert Consultation. Public health appropriate body-mass index for Asian  
14  
15 352 populations and its implications for policy and intervention strategies. *Lancet* 2004;  
16  
17 353 363: 157-63.
- 18  
19 354 14. Saito Y, Shirai K, Nakamura T, *et al.* Diagnostic criteria for obesity 2011. *Obesity*  
20  
21 355 *Research* 2011; 7: s1-s78 [in Japanese]
- 22  
23 356 15. Kitamura Y. Meanings of panel data and its use. *The Japanese Journal of Labour*  
24  
25 357 *Studies* 2006; 551: 6-16 [in Japanese]
- 26  
27 358 16. Totsuka K, Maeno T, Saito K, *et al.* Self-reported fast eating is a potent predictor of  
28  
29 359 development of impaired glucose tolerance in Japanese men and women: Tsukuba  
30  
31 360 Medical Center Study. *Diabetes Res Clin Pract* 2011; 94: e72-e74.
- 32  
33 361 17. Otsuka R, Tamakoshi K, Yatsuya H, *et al.* Eating fast leads to insulin resistance:  
34  
35 362 findings in middle-aged Japanese men and women. *Prev Med* 2008; 46: 154-9.
- 36  
37 363 18. Sakurai M, Nakamura K, Miura K, *et al.* Self-reported speed of eating and 7-year  
38  
39 364 risk of type2 diabetes mellitus in middle-aged Japanese men. *Metabolism* 2012; 61:  
40  
41 365 1566-71.
- 42  
43 366 19. Yamane M, Ekumi D, Kataoka K, *et al.* Relationships between eating quickly and  
44  
45 367 weight gain in Japanese university students: a longitudinal study. *Obesity* 2014; 22:  
46  
47 368 2262-6.
- 48  
49 369 20. Tanihara S, Imatoh T, Miyazaki M, *et al.* Retrospective longitudinal study on the  
50  
51 370 relationship between 8-year weight change and current eating speed. *Appetite* 2011;  
52  
53 371 57: 179-83.
- 54  
55 372 21. Oya J, Nakagami T, Sasaki S, *et al.* Characteristics of nutritional intake and exercise  
56  
57 373 habits according to classifications of the Standard Health Checkup and Counseling  
58  
59 374 Guidance Program: an analysis of Kurihara Lifestyle Cohort Study data. *The Journal*



- 1  
2  
3 375 *of Metabolism and Clinical Nutrition* 2011; 14: 25-32. [in Japanese]  
4  
5 376 22. Otsuka R, Tamakoshi K, Yatsuya H, *et al.* Eating fast leads to obesity Findings based  
6  
7 377 on self-administered questionnaires among middle-aged Japanese men and women. *J*  
8  
9 378 *Epidemiol* 2006; 16: 117-24.  
10  
11 379 23. Sasaki S, Katagiri A, Tsuji T, *et al.* Self-reported rate of eating correlates with body  
12  
13 380 mass index in 18-y-old Japanese women. *Int J Obes Relat Metab Disord* 2003; 27:  
14  
15 381 1405-10.  
16  
17 382 24. Momose Y, Une H, Hayashi M, *et al.* Habit of eating quickly is independently related  
18  
19 383 with overweight among Japanese rural residents aged 40-79 years. *Journal of the*  
20  
21 384 *Japanese Association of Rural Medicine* 2010; 58; 533-40. [in Japanese]  
22  
23 385 25. Maruyama K, Sato S, Ohira T, *et al.* The joint impact on being overweight of self  
24  
25 386 reported behaviours of eating quickly and eating until full: cross sectional study.  
26  
27 387 *BMJ* 2008; 337: a2002.  
28  
29 388 26. Andrade AM, Greene GW, Melanson KJ. Eating slowly led to decreases in energy  
30  
31 389 intake within meals in healthy women. *J Am Diet Assoc* 2008; 108: 1186-91.  
32  
33 390 27. Martin CK, Anton SD, Walden H, *et al.* Slower eating rate reduces the food intake of  
34  
35 391 men, but not women: Implications for behavioral weight control. *Behav Res Ther*  
36  
37 392 2007; 45: 2349-59.  
38  
39 393 28. Spiegel TA, Wadden TA, Foster GD. Objective measurement of eating rate during  
40  
41 394 behavioral treatment of obesity. *Behav Ther* 1991; 22: 61-7.  
42  
43 395 29. Ochiai H, Shirasawa T, Ohtsu T, *et al.* The impact of eating quickly on  
44  
45 396 anthropometric variables among schoolgirls: A prospective cohort study in Japan.  
46  
47 397 *Eur J Public Health* 2014; 24: 691-5.  
48  
49 398 30. Odegaard AO, Jacobs DR Jr, Steffen LM, *et al.* Breakfast frequency and development  
50  
51 399 of metabolic risk. *Diabetes Care* 2013; 36: 3100-6.  
52  
53 400 31. Smith KJ, Gall SL, McNaughton SA, *et al.* Skipping breakfast: longitudinal  
54  
55 401 associations with cardiometabolic risk factors in the Childhood Determinants of  
56  
57 402 Adult Health Study. *Am J Clin Nutr* 2010; 92: 1316-25.  
58  
59 403 32. Dorn JM, Hovey K, Muti P, *et al.* Alcohol drinking patterns differentially affect  
60

- 1  
2  
3 404 central adiposity as measured by abdominal height in women and men. *J Nutr* 2003;  
4 405 133: 2655-62.  
5  
6  
7 406 33. Tolstrup JS, Halkjaer J, Heitmann BL, *et al.* Alcohol drinking frequency in relation  
8 407 to subsequent changes in waist circumference. *Am J Clin Nutr* 2008; 87: 957-63.  
9  
10 408 34. Tolstrup JS, Heitmann BL, Tjønneland AM, *et al.* The relation between drinking  
11 409 pattern and body mass index and waist and hip circumference. *Int J Obes* 2005; 29:  
12 410 490-7.  
13  
14  
15  
16 411 35. Lee J, Choi YS, Jeong YJ, *et al.* Poor-quality sleep is associated with metabolic  
17 412 syndrome in Korean adults. *Tohoku J Exp Med* 2013; 231: 281-91.  
18  
19  
20 413 36. Nishiura C, Hashimoto H. A 4-year study of the association between short sleep  
21 414 duration and change in body mass index in Japanese male workers. *J Epidemiol*  
22 415 2010; 20: 385-90.  
23  
24  
25  
26 416 37. Taheri S, Lin L, Austin D, *et al.* Short sleep duration is associated with reduced  
27 417 leptin, elevated ghrelin, and increased body mass index. *PLoS Med* 2004; 1: e62.  
28  
29  
30 418 38. Lundahl A, Nelson T. Sleep and food intake: A multisystem review of mechanisms in  
31 419 children and adults. *J Health Psychol* 2015; 20: 794-805.  
32  
33  
34 420 39. Sogabe N, Maruyama R, Sato K, *et al.* Relationships between smoking and eating  
35 421 habits or behavior in male students. *Nihon Koshu Eisei Zasshi* 2008;55:30-6. [in  
36 422 Japanese]  
37  
38  
39 423 40. Yamauchi T, Takaki M, Tonai M. Images and recognition about "eating quickly". *The*  
40 424 *Journal of Japan Society for Health Care Management* 2003; 4(2): 311-318. [in  
41 425 Japanese]

426 **Table 1. Distribution of baseline characteristics according to eating speed**

|                                                                   | Eating Speed         |                        |                     | P                   |
|-------------------------------------------------------------------|----------------------|------------------------|---------------------|---------------------|
|                                                                   | Fast<br>(n = 22,062) | Normal<br>(n = 33,460) | Slow<br>(n = 4,191) |                     |
| Number of checkups                                                | 4.2 [1.5]            | 4.2 [1.6]              | 4.4 [1.6]           | <0.001 <sup>b</sup> |
| Women                                                             | 6,023<br>(27.3%)     | 12,213<br>(36.5%)      | 1,861<br>(44.4%)    | <0.001 <sup>a</sup> |
| Age                                                               | 46.6 [10.4]          | 48.1 [10.6]            | 46.5 [11.7]         | <0.001 <sup>b</sup> |
| Use of anti-diabetic medications                                  | 13,648<br>(61.8%)    | 20,074<br>(60%)        | 2,525<br>(60.2%)    | <0.001 <sup>a</sup> |
| BMI, kg/m <sup>2</sup>                                            | 25 [4.4]             | 23.4 [4.0]             | 22.3 [4.0]          | <0.001 <sup>b</sup> |
| Obese (BMI ≥25)                                                   | 9,884<br>(44.8%)     | 9,886<br>(29.6%)       | 901<br>(21.5%)      | <0.001 <sup>a</sup> |
| Eating dinner within 2 hours before<br>sleeping ≥3 times per week | 9,545<br>(43.3%)     | 11,161<br>(33.4%)      | 1,541<br>(36.8%)    | <0.001 <sup>a</sup> |
| Snacking after dinner ≥3 times per week                           | 4,247<br>(19.2%)     | 4,851<br>(14.5%)       | 809<br>(19.3%)      | <0.001 <sup>a</sup> |
| Skipping breakfast ≥3 times per week                              | 4,599<br>(20.8%)     | 5,542<br>(16.6%)       | 794<br>(18.9%)      | <0.001 <sup>a</sup> |
| Alcohol consumption                                               |                      |                        |                     |                     |
| Every day                                                         | 5,695<br>(25.8%)     | 8,810<br>(26.3%)       | 955<br>(22.8%)      | <0.001 <sup>a</sup> |
| Occasionally                                                      | 7,233<br>(32.8%)     | 10,398<br>(31.1%)      | 1,152<br>(27.5%)    | <0.001 <sup>a</sup> |
| Rarely or never                                                   | 9,142<br>(41.4%)     | 14,247<br>(42.6%)      | 2,085<br>(49.7%)    | <0.001 <sup>a</sup> |
| Obtain adequate sleep                                             | 10,834<br>(49.1%)    | 18,437<br>(55.1%)      | 2,238<br>(53.4%)    | <0.001 <sup>a</sup> |
| Habitual smoker                                                   | 7,140<br>(32.4%)     | 10,239<br>(30.6%)      | 1,146<br>(27.3%)    | <0.001 <sup>a</sup> |

427 <sup>a</sup>  $\chi^2$  test428 <sup>b</sup> One-way analysis of variance429 Values for number of checkups, age, and BMI are presented as mean [standard deviation]. All  
430 other values are presented as number of subjects (proportion of each eating-speed group).

431 Abbreviation: BMI, body mass index.

432 **Table 2. Estimated odds ratios of the determinants of obesity derived from the**  
 433 **generalized estimating equation model**

|                                                                      | <b>Odds Ratio</b> | <b>95% Confidence Intervals</b> | <b>P</b> |
|----------------------------------------------------------------------|-------------------|---------------------------------|----------|
| Eating speed                                                         |                   |                                 |          |
| Fast                                                                 | REF               |                                 |          |
| Normal                                                               | 0.70              | 0.67 - 0.73                     | <0.001   |
| Slow                                                                 | 0.56              | 0.52 - 0.61                     | <0.001   |
| Eating dinner within 2 hours before sleeping $\geq 3$ times per week |                   |                                 |          |
| Yes                                                                  | REF               |                                 |          |
| No                                                                   | 0.85              | 0.81 - 0.89                     | <0.001   |
| Snacking after dinner $\geq 3$ times per week                        |                   |                                 |          |
| Yes                                                                  | REF               |                                 |          |
| No                                                                   | 0.89              | 0.82 - 0.92                     | <0.001   |
| Skipping breakfast $\geq 3$ times per week                           |                   |                                 |          |
| Yes                                                                  | REF               |                                 |          |
| No                                                                   | 0.92              | 0.87 - 0.97                     | 0.003    |
| Alcohol consumption                                                  |                   |                                 |          |
| Every day                                                            | REF               |                                 |          |
| Occasionally                                                         | 1.13              | 1.07 - 1.20                     | <0.001   |
| Rarely or never                                                      | 1.09              | 1.03 - 1.15                     | 0.002    |
| Obtain adequate sleep                                                |                   |                                 |          |
| Yes                                                                  | REF               |                                 |          |
| No                                                                   | 1.05              | 1.01 - 1.10                     | 0.023    |
| Habitual smoker                                                      |                   |                                 |          |
| Yes                                                                  | REF               |                                 |          |
| No                                                                   | 1.02              | 0.98 - 1.07                     | 0.363    |
| Use of anti-diabetic medication                                      |                   |                                 |          |
| No                                                                   | REF               |                                 |          |
| Yes                                                                  | 1.04              | 0.997 - 1.087                   | 0.069    |
| Age                                                                  | 0.997             | 0.995 - 0.999                   | 0.008    |
| Obesity status in the previous checkup                               |                   |                                 |          |
| Not obese                                                            | REF               |                                 |          |
| Obese                                                                | 172.36            | 163.35 - 181.87                 | <0.001   |

434

435 **Table 3. Estimated coefficients of the determinants of changes in BMI derived**  
 436 **from the fixed-effects model**

|                                                                      | <b>Coefficient</b> | <b>95%<br/>Confidence<br/>Intervals</b> | <b>P</b> |
|----------------------------------------------------------------------|--------------------|-----------------------------------------|----------|
| Eating speed                                                         |                    |                                         |          |
| Fast                                                                 | REF                |                                         |          |
| Normal                                                               | -0.07              | -0.10, -0.05                            | <0.001   |
| Slow                                                                 | -0.11              | -0.15, -0.06                            | <0.001   |
| Eating dinner within 2 hours before sleeping $\geq 3$ times per week |                    |                                         |          |
| Yes                                                                  | REF                |                                         |          |
| No                                                                   | -0.06              | -0.08, -0.04                            | <0.001   |
| Snacking after dinner $\geq 3$ times per week                        |                    |                                         |          |
| Yes                                                                  | REF                |                                         |          |
| No                                                                   | -0.08              | -0.11, -0.06                            | <0.001   |
| Skipping breakfast $\geq 3$ times per week                           |                    |                                         |          |
| Yes                                                                  | REF                |                                         |          |
| No                                                                   | 0.00               | -0.03, 0.04                             | 0.818    |
| Alcohol consumption                                                  |                    |                                         |          |
| Every day                                                            | REF                |                                         |          |
| Occasionally                                                         | -0.10              | -0.13, -0.06                            | <0.001   |
| Rarely or never                                                      | -0.17              | -0.22, -0.13                            | 0.002    |
| Obtain adequate sleep                                                |                    |                                         |          |
| Yes                                                                  | REF                |                                         |          |
| No                                                                   | -0.03              | -0.05, -0.01                            | 0.001    |
| Habitual smoker                                                      |                    |                                         |          |
| Yes                                                                  | REF                |                                         |          |
| No                                                                   | 0.23               | 0.20, 0.27                              | 0.363    |
| Use of anti-diabetic medication                                      |                    |                                         |          |
| No                                                                   | REF                |                                         |          |
| Yes                                                                  | -0.12              | -0.14, -0.10                            | 0.069    |
| Age                                                                  | 0.08               | 0.07, 0.10                              | 0.008    |
| BMI in the previous checkup                                          | 0.09               | 0.07, 0.10                              | <0.001   |

437 Abbreviation: BMI, body mass index.

# BMJ Open

## The effects of changes in eating speed on obesity: a secondary analysis of longitudinal health checkup data

|                                 |                                                                                                                                                                                    |
|---------------------------------|------------------------------------------------------------------------------------------------------------------------------------------------------------------------------------|
| Journal:                        | <i>BMJ Open</i>                                                                                                                                                                    |
| Manuscript ID                   | bmjopen-2017-019589.R1                                                                                                                                                             |
| Article Type:                   | Research                                                                                                                                                                           |
| Date Submitted by the Author:   | 13-Nov-2017                                                                                                                                                                        |
| Complete List of Authors:       | Hurst, Yumi; Kyushu University, Department of Health Care Administration and Management<br>Fukuda , H ; Kyushu University, Department of Health Care Administration and Management |
| <b>Primary Subject Heading</b>: | Public health                                                                                                                                                                      |
| Secondary Subject Heading:      | Epidemiology                                                                                                                                                                       |
| Keywords:                       | PUBLIC HEALTH, obesity, Body mass index, eating habits, health checkups                                                                                                            |
|                                 |                                                                                                                                                                                    |

SCHOLARONE™  
Manuscripts

Peer Review Only

1  
2  
3 1  
4  
5 2  
6  
7 3 **The effects of changes in eating speed on obesity: a secondary analysis of**  
8  
9 4 **longitudinal health checkup data**  
10

11 5  
12  
13 6 Hurst Y, Fukuda H.  
14

15 7  
16  
17 8 Department of Health Care Administration and Management,  
18  
19 9 Kyushu University Graduate School of Medical Sciences  
20  
21 10 3-1-1, Maidashi, Higashi-ku, Fukuoka, 812-8582, Japan  
22

23 11  
24 12  
25 13 ***Corresponding Author***

26 14 **Haruhisa Fukuda, MPH, PhD**

27  
28  
29 15 *Department of Health Care Administration and Management, Kyushu*  
30  
31 16 *University Graduate School of Medical Sciences*  
32  
33 17 3-1-1 Maidashi Higashi-ku Fukuoka 812-8582, Japan  
34  
35 18 Phone: +81-92-642-6956 Fax: +81-92-642-6961  
36  
37 19 Email address: h\_fukuda@hcam.med.kyushu-u.ac.jp  
38  
39 20  
40  
41  
42  
43  
44  
45  
46  
47  
48  
49  
50  
51  
52  
53  
54  
55  
56  
57  
58  
59  
60

1  
2  
3 22 **Abstract**

4 23 **Objective** Few studies have examined the causal relationships between lifestyle  
5  
6 24 habits and obesity. With a focus on eating speed, this study aimed to analyze the  
7  
8 25 effects of changes in lifestyle habits on changes in obesity utilizing panel data.  
9

10 26 **Methods** Patient-level panel data from 2008 to 2013 were generated using  
11  
12 27 commercially available insurance claims data and health checkup data. The study  
13  
14 28 subjects comprised Japanese men and women (n=59,717) enrolled in health insurance  
15  
16 29 societies who had been diagnosed with type 2 diabetes during the study period. Body  
17  
18 30 mass index (BMI) was measured, and obesity was defined as a BMI of 25 or more.  
19  
20 31 Information on lifestyle habits were obtained from the subjects' responses to  
21  
22 32 questions asked during health checkups. The main exposure of interest was eating  
23  
24 33 speed ("fast", "normal", and "slow"). Other lifestyle habits included eating dinner  
25  
26 34 within 2 hours of sleeping, after-dinner snacking, skipping breakfast, alcohol  
27  
28 35 consumption frequency, sleep adequacy, and tobacco consumption. A generalized  
29  
30 36 estimating equation model and fixed-effects model were used to examine the effects  
31  
32 37 of these habits on obesity and BMI, respectively.  
33

34 38 **Results** The generalized estimating equation model showed that eating slower  
35  
36 39 inhibited the development of obesity. The odds ratios for slow (0.58) and normal-  
37  
38 40 speed eaters (0.71) indicated that these groups were less likely to be obese than fast  
39  
40 41 eaters ( $P < 0.001$ ). Similarly, the fixed-effects model showed that eating slower  
41  
42 42 reduced BMIs. Relative to fast eaters, the coefficients for slow and normal-speed  
43  
44 43 eaters were -0.11 and -0.07, respectively ( $P < 0.001$ ).  
45

46 44 **Discussion** Changes in eating speed can affect changes in obesity and BMI.  
47  
48 45 Interventions aimed at reducing eating speed may be effective in preventing obesity  
49  
50 46 and lowering the associated health risks.  
51

52 47  
53  
54 48 **Keywords:** Body mass index, obesity, eating habits, health checkups  
55  
56 49



1  
2  
3 **50 Strengths and limitations of this study**

- 4  
5 51 1. This is the first panel data analysis to verify the effects of changes in eating  
6  
7 52 habits on obesity.  
8  
9 53 2. Long-term large-scale longitudinal data were used.  
10  
11 54 3. Lifestyle habits were self-assessed and may be vulnerable to reporting bias.  
12  
13 55 4. The sample comprised relatively health-conscious individuals who voluntarily  
14  
15 56 participated in health checkups, and the findings may therefore have limited  
16  
17 57 applicability to less health-conscious people.  
18

19 58  
20  
21  
22  
23  
24  
25  
26  
27  
28  
29  
30  
31  
32  
33  
34  
35  
36  
37  
38  
39  
40  
41  
42  
43  
44  
45  
46  
47  
48  
49  
50  
51  
52  
53  
54  
55  
56  
57  
58  
59  
60

## 59 Introduction

60 Excess body weight and obesity can lead to an increased risk of developing  
61 noncommunicable diseases such as diabetes, cardiovascular disease, and various  
62 forms of cancer.<sup>1-4</sup> Studies have reported that the regulation of body weight can be  
63 effective in lowering these health risks.<sup>1-4</sup> However, a 10-year longitudinal study of  
64 Japanese men aged 40 to 69 years found that the proportion of overweight and obese  
65 individuals had increased over the study period.<sup>5</sup> In addition, the Japanese  
66 government's *Annual Health, Labour and Welfare Report 2014* noted that the  
67 prevalence of obesity continues to rise, with a substantially higher prevalence among  
68 men in 2012 than in 1982.<sup>6</sup> The report also revealed that obesity prevalence exceeded  
69 30% in men in their 40s and 50s. These figures suggest that current obesity  
70 prevention efforts in Japan may be inadequate.

71 The fundamental cause of excess weight gain is the failure to ensure a balance  
72 between energy intake and energy expenditure.<sup>1</sup> However, recent studies have  
73 reported that excess weight gain and metabolic syndrome are affected not only by  
74 energy intake, but are also influenced by other factors such as eating speed, eating  
75 frequency, and other lifestyle habits.<sup>7-10</sup> In addition to emphasizing the importance of  
76 balancing energy intake and expenditure, these other factors represent possible targets  
77 for obesity prevention measures.

78 In response to the rising prevalence of obesity, Japan's Ministry of Health,  
79 Labour and Welfare introduced a nationwide health screening program (Standard  
80 Health Checkup and Counseling Guidance Program) to detect risk factors for obesity  
81 and metabolic syndrome.<sup>11,12</sup> Under this program, insurers conduct "specific health  
82 checkups" aimed at insurance enrollees aged 40 years or older. However, participation  
83 in these checkups is not mandatory.

84 Although many studies have addressed the associations between lifestyle habits  
85 and obesity, few have examined the causal effects of changes in lifestyle habits on  
86 obesity. In addition, studies from Japan have shown that the number of persons with

1  
2  
3 87 type 2 diabetes has increased with increasing BMI<sup>13</sup>, and that BMI is an independent  
4  
5 88 risk factor for this condition<sup>14</sup>. This study focuses on persons with type 2 diabetes as  
6  
7 89 they are likely to benefit directly from health improvements arising from the  
8  
9 90 alleviation of obesity. The main objective of this study was to utilize panel data to  
10  
11 91 analyze the effects of changes in eating speed and other lifestyle habits on obesity.  
12  
13 92 For this analysis, we hypothesized that slower eating speeds would reduce obesity.  
14  
15 93

## 94 **Methods**

### 95 **Data source**

96 This study used a commercial database obtained from the Japan Medical Data Center  
97 (JMDC), a for-profit organization that collects, curates, and distributes health-related  
98 data. The database comprised insurance claims data and health checkup data for  
99 insurance enrollees and their dependents that were collected through JMDC's  
100 contracts with several health insurance societies in Japan. The claims data included  
101 information on the dates of consultations and treatments, sex, age, diagnoses, specific  
102 treatments, and healthcare expenditure. The health checkup data included the dates of  
103 checkups, body mass index (BMI), waist circumference, blood pressure, and the  
104 results of blood chemical analysis, liver function test, blood glucose test, and  
105 urinalysis. The health checkup data also included the subjects' responses to several  
106 questions regarding lifestyle factors, such as eating habits, alcohol consumption,  
107 tobacco use, and sleeping habits.<sup>12</sup> The claims data and health checkup data were  
108 linked at the individual subject level for analysis. Approval for this study was  
109 obtained from the ethics committee of the JMDC.

### 111 **Study design**

112 We first identified subjects with at least one recorded diagnosis of type 2 diabetes in  
113 their claims data from January 2005 to June 2013 using the corresponding  
114 International Classification of Diseases, 10th revision codes (E10–E14). Both the

1  
2  
3 115 claims data and health checkup data from this study period were used in the analysis.  
4  
5 116 From the claims data, we obtained information on subject sex, age, and the starting  
6  
7 117 date of anti-diabetic medication. The claims data were linked with the health checkup  
8  
9 118 data at the patient-month level to generate panel data. We excluded subjects with  
10  
11 119 missing data for BMI and lifestyle habits. The results from each subject's first  
12  
13 120 specific health checkup during the study period were used as the baseline values.  
14  
15 121

## 16 122 **Outcomes**

17  
18 123 The primary outcome of this study was obesity status. According to the World Health  
19  
20 124 Organization's criteria, a BMI of 25 or more indicates that a person is overweight,  
21  
22 125 and a BMI of 30 or more indicates obesity. However, it has been proposed that these  
23  
24 126 BMI cut-off points should be lower for Asian populations.<sup>15</sup> The Japan Society for the  
25  
26 127 Study of Obesity has recommended that obesity be defined by a BMI of 25 or more  
27  
28 128 for the Japanese population.<sup>16</sup> In accordance with this recommendation, our study  
29  
30 129 uses a BMI cut-off point of 25 to identify obese individuals. The secondary outcome  
31  
32 130 of this study was BMI, which was analyzed as a continuous variable.  
33  
34 131

## 36 132 **Exposure variables**

37  
38 133 The exposure variables consisted of the 7 question items regarding lifestyle habits.  
39  
40 134 The main exposure of interest was eating speed. The other items were eating dinner  
41  
42 135 within 2 hours before sleeping for 3 times or more per week, snacking after dinner for  
43  
44 136 3 times or more per week, skipping breakfast 3 times or more per week, alcohol  
45  
46 137 consumption frequency, sleep adequacy, and habitual smoking. These variables were  
47  
48 138 analyzed as categorical variables based on the response options. Eating speed was  
49  
50 139 analyzed as 3 categories ("fast", "normal", and "slow"). Eating dinner within 2 hours  
51  
52 140 before sleeping for 3 times or more per week, snacking after dinner for 3 times or  
53  
54 141 more per week, skipping breakfast 3 times or more per week, adequate sleep, and  
55  
56 142 habitual smoking were analyzed as 2 categories ("yes" and "no"). Alcohol  
57  
58  
59  
60

1  
2  
3 143 consumption frequency was analyzed as 3 categories (“every day”, “occasionally”,  
4 144 and “rarely or never”).

5  
6 145

7  
8  
9 146 **Covariates**

10 147 The covariates were selected from factors thought to influence lifestyle habits and  
11  
12 148 weight management. These included the use of anti-diabetic medication (as an  
13  
14 149 indicator of diabetes that requires pharmacologic treatment), age, as well as obesity  
15  
16 150 status and BMI in the previous checkup. The use or non-use of anti-diabetic  
17  
18 151 medication was determined based on whether the patient had been administered anti-  
19  
20 152 diabetic medication at the time of each health checkup. This variable was analyzed as  
21  
22 153 2 categories (“yes” and “no”). In addition to human insulin preparations and insulin  
23  
24 154 analogs, anti-diabetic medications also included sulfonylureas, biguanide derivatives,  
25  
26 155 glitazones,  $\alpha$ -glucosidase inhibitors, glinides, DPP-4 inhibitors, and GLP-1 receptor  
27  
28 156 agonists. Age and BMI in the previous checkup were analyzed as continuous variables.  
29  
30 157 Obesity status in the previous checkup was analyzed as 2 categories (“yes” for BMI  
31  
32 158  $\geq 25$  and “no” for BMI  $< 25$ ).

33  
34 159

35  
36 160 **Statistical analysis**

37  
38 161 The subject baseline characteristics of sex, age, BMI, obesity status, and lifestyle  
39  
40 162 habits were compared among the 3 eating speed categories using the  $\chi^2$  test or one-  
41  
42 163 way analysis of variance. Patient-level panel data were generated using repeated  
43  
44 164 estimates from multiple health checkups. This study used longitudinal data from  
45  
46 165 annual health checkups collected over approximately 6 years. The application of  
47  
48 166 panel data enables the estimation of changes in the dependent variables that result  
49  
50 167 from changes in eating speed (e.g., fast to fast, fast to normal, fast to slow, and so on)  
51  
52 168 in individual subjects.

53  
54 169 We first constructed a generalized estimating equation model to elucidate the  
55  
56 170 effects of changes in eating speed on obesity. The exposure variables were the 7

1  
2  
3 171 lifestyle habit items, and the covariates were the use of anti-diabetic medication, age,  
4  
5 172 sex, and obesity status in the previous checkup.

6  
7 173 In order to estimate the influence of changes in eating speed on BMI, we  
8  
9 174 utilized a fixed-effects model where the dependent variable was BMI. The exposure  
10  
11 175 variables were the 7 lifestyle habit items, and the covariates were the use of anti-  
12  
13 176 diabetic medication, age, and BMI in the previous checkup. Sex and other covariates  
14  
15 177 that remained unchanged throughout the observation period were adjusted as fixed  
16  
17 178 effects. The Hausman test was employed for model selection; the *P*-value was below  
18  
19 179 0.001, which confirmed that the use of the fixed-effects model was appropriate.

20  
21 180 All statistical analyses were conducted using Stata 13.1 (Stata Corp., College  
22  
23 181 Station, TX, USA). Statistical significance was set at  $P < 0.05$ .

24  
25 182

## 26 183 **Results**

27  
28 184 We identified 92,363 individuals from 303,361 person-months who had been  
29  
30 185 diagnosed with type 2 diabetes and had health checkup data for the period between  
31  
32 186 January 2005 and June 2013. After excluding cases with missing data in BMI and the  
33  
34 187 lifestyle habit items, the sample for analysis comprised 59,717 individuals from  
35  
36 188 129,978 person-months. The claims data and health checkup data that could be linked  
37  
38 189 for analysis covered the period from February 2008 to June 2013.

39  
40 190 The distribution of baseline characteristics according to eating speed is  
41  
42 191 presented in Table 1. The slow-eating group had a significantly higher proportion of  
43  
44 192 women (44.4%), lower mean BMI ( $22.3 \pm 4.0$ ), lower proportion of obese individuals  
45  
46 193 (21.5%), lower alcohol consumption frequency (every day: 22.8%; occasionally:  
47  
48 194 27.5%; rarely or never: 49.7%), and lower proportion of habitual smokers (27.3%)  
49  
50 195 when compared with the other 2 groups (all:  $P < 0.001$ ). In contrast, the fast-eating  
51  
52 196 group had a significantly lower proportion of women (27.3%,  $P < 0.001$ ), but a  
53  
54 197 significantly higher mean BMI ( $25.0 \pm 4.4$ ,  $P < 0.001$ ) and higher proportion of obese  
55  
56 198 individuals (44.8%,  $P < 0.001$ ).

1  
2  
3 199 Table 2 shows the estimated odds ratios (ORs) of the various determinants of  
4 200 obesity derived from the generalized estimating equation model. All eating habit  
5 201 items, alcohol consumption frequency, sleep adequacy, and obesity status in the  
6 202 previous checkup were significantly associated with obesity. When compared with the  
7 203 fast-eating group, the slower eating speeds were significantly associated with reduced  
8 204 ORs for obesity (normal: 0.71; slow: 0.58;  $P < 0.001$ ). The results also showed that  
9 205 reduced alcohol consumption frequency was significantly associated with higher ORs  
10 206 for obesity (occasionally: 1.18; rarely or never: 1.22;  $P < 0.001$ ). In addition,  
11 207 inadequate sleep was significantly associated with a higher OR for obesity ( $1.06, P =$   
12 208  $0.007$ ). Habitual smoking was also significantly associated with the outcome.

13 209 The estimated coefficients of the various determinants of changes in BMI are  
14 210 presented in Table 3. Eating speed (normal:  $P < 0.001$ ; slow:  $P < 0.001$ ), eating  
15 211 dinner within 2 hours before sleeping for 3 times or more per week ( $P < 0.001$ ),  
16 212 snacking after dinner for 3 times or more per week ( $P < 0.001$ ), BMI in the previous  
17 213 checkup ( $P < 0.001$ ), alcohol consumption frequency (occasionally:  $P < 0.001$ ; rarely  
18 214 or never:  $P = 0.002$ ), sleep adequacy ( $P < 0.001$ ), and age ( $P = 0.008$ ) were  
19 215 significantly associated with changes in BMI. With the exception of age and BMI in  
20 216 the previous checkup, the coefficients of all the other factors were negative. This  
21 217 indicated that eating slower, not eating dinner within 2 hours before sleeping, not  
22 218 snacking after dinner, drinking infrequently, and not obtaining adequate sleep were  
23 219 associated with reductions in BMI. Skipping breakfast 3 times or more per week,  
24 220 habitual smoking, and the use of anti-diabetic medication were not significantly  
25 221 associated with BMI.

26 222

## 27 223 **Discussion**

28 224 This study analyzed Japanese men and women who had undergone specific health  
29 225 checkups regardless of obesity status. Possible lifestyle-related determinants of  
30 226 obesity were identified using questionnaire items from the Standard Health Checkup

1  
2  
3 227 and Counseling Guidance Program.<sup>12</sup> We examined 6-year panel data to determine  
4 228 how changes in eating speed and other lifestyle habits affect obesity and BMI. The  
5  
6 229 main results indicated that decreases in eating speeds can lead to reductions in  
7  
8 230 obesity and BMI after controlling for the covariates. In addition, the study found that  
9  
10 231 the cessation of eating after dinner or within 2 hours before sleeping would also have  
11  
12 232 a similar effect on reducing excess body weight.

13  
14 233 A strength of this study is the utilization of large-scale panel data from  
15  
16 234 approximately 60,000 diabetes patients spanning a 6-year observation period. The use  
17  
18 235 of panel data increases the accuracy of estimates when compared with conventional  
19  
20 236 cross-sectional and time series data.<sup>17</sup> Panel data also enable adjustments of the  
21  
22 237 unobservable differences between study subpopulations, thereby facilitating analyses  
23  
24 238 of the effects of behavioral changes in subjects. Another strength of this study is the  
25  
26 239 incorporation of data on lifestyle habits, such as eating, sleeping, and smoking. By  
27  
28 240 analyzing the associations between these habits and obesity, our study was able to  
29  
30 241 quantify the possible effects of changes in these habits on obesity.

31  
32 242 The major finding of this study is that changes in eating speed can affect  
33  
34 243 obesity and BMI. The control of eating speed may therefore be a possible means of  
35  
36 244 regulating body weight and preventing obesity, which in turn reduces the risk of  
37  
38 245 developing noncommunicable diseases. Eating quickly is associated with impaired  
39  
40 246 glucose tolerance and insulin resistance,<sup>18,19</sup> and is a known risk factor for diabetes  
41  
42 247 through increases in body weight.<sup>20</sup> Other studies have also reported associations  
43  
44 248 between eating quickly and increased BMI, indicating that eating speed is a  
45  
46 249 contributing factor for obesity.<sup>7,8,21-26</sup> A possible reason for this association is that  
47  
48 250 fast eaters may continue to eat until they feel full despite having already consumed an  
49  
50 251 adequate amount of calories, and the combined effect of eating quickly and  
51  
52 252 overeating may contribute to weight gain.<sup>27</sup> In contrast, eating slowly may help to  
53  
54 253 increase feelings of satiety before an excessive amount of food is ingested.<sup>28-30</sup> A  
55  
56 254 prospective study of schoolgirls found that the reduction of eating speed was able to



1  
2  
3 255 suppress weight gain and prevent obesity.<sup>31</sup> The findings of these studies are  
4  
5 256 consistent with those of our analysis.

6  
7 257 In addition to BMI-based definitions of obesity, waist circumference–based  
8  
9 258 definitions of abdominal obesity have also become increasingly important in recent  
10  
11 259 years. Cerhan *et al.* proposed that assessments of waist circumference should  
12  
13 260 accompany assessments of BMI.<sup>32</sup> As a supplementary analysis, we employed a fixed-  
14  
15 261 effects model to examine the effects of changes in eating speed on waist  
16  
17 262 circumference in our subjects. The results showed that when compared with fast  
18  
19 263 eaters, normal-speed eaters and slow eaters had reductions in waist circumference of  
20  
21 264 0.21 cm and 0.41 cm, respectively ( $P < 0.001$ ). These results support our findings of  
22  
23 265 the effects of changes in eating speed on obesity.

24  
25 266 Our results also indicated that frequently eating dinner within 2 hours before  
26  
27 267 sleeping, snacking after dinner, and skipping breakfast contribute to the development  
28  
29 268 of obesity. Previous studies have identified eating after dinner and within 2 hours  
30  
31 269 before sleeping as risk factors of metabolic syndrome.<sup>7</sup> This supports our findings  
32  
33 270 that the cessation of these habits can help to reduce obesity and BMI. Skipping  
34  
35 271 breakfast has also been shown to be associated with excess weight and obesity, and is  
36  
37 272 a risk factor of metabolic syndrome.<sup>7,9,33</sup> Our generalized estimating equation model  
38  
39 273 revealed that consistently eating breakfast can reduce obesity, which also  
40  
41 274 corroborates the findings of previous studies. However, our fixed-effects model  
42  
43 275 showed that consistently eating breakfast did not affect changes in BMI. It has been  
44  
45 276 reported that skipping breakfast over a long-period is associated with high BMI and  
46  
47 277 elevated cardiometabolic risks.<sup>34</sup> Consistently eating breakfast may therefore help to  
48  
49 278 control obesity and BMI.

50  
51 279 Daily alcohol consumption has been reported to be positively associated with  
52  
53 280 obesity, and is another risk factor of metabolic syndrome.<sup>7,35</sup> However, our findings  
54  
55 281 indicated that alcohol consumption frequency was not significantly associated with  
56  
57 282 obesity. Previous studies have reported that the frequency of alcohol consumption

1  
2  
3 283 (given the same quantities of alcohol) was inversely associated with obesity.<sup>36,37</sup> It is  
4 284 possible that the subjects in this study who drank with higher frequency were  
5  
6 285 consuming moderate quantities of alcohol, whereas the subjects who drank  
7  
8 286 infrequently consumed larger quantities during each session.  
9

10 287 Studies have also found associations between short sleep durations and BMI  
11  
12 288 increases, and that poor-quality sleep is associated with metabolic syndrome.<sup>38-40</sup> Our  
13  
14 289 analysis produced contradictory results in that a change from adequate sleep to  
15  
16 290 inadequate sleep would reduce BMI but increase obesity progression. A recent study  
17  
18 291 has shown that unstable sleep patterns may increase the quantity of food intake,<sup>41</sup> and  
19  
20 292 our findings therefore require further investigation. The lack of association between  
21  
22 293 habitual smoking and BMI or metabolic syndrome has been reported in previous  
23  
24 294 studies,<sup>7,42</sup> which corroborates our findings.

25  
26 295 This study has several limitations that should be considered. First, this study  
27  
28 296 utilized health checkup data from health insurance societies. As a result, the data may  
29  
30 297 not have included a large proportion of the insurance enrollees' dependents. In  
31  
32 298 particular, there was a relatively small proportion of older adults in our study  
33  
34 299 population. The results may therefore lack generalizability to other subpopulations.  
35  
36 300 Second, eating speed and the other lifestyle habits were self-assessed, and may  
37  
38 301 therefore be vulnerable to reporting bias. However, while the differences in  
39  
40 302 perceptions of eating and sleeping habits in standardized questionnaires have been  
41  
42 303 described,<sup>43</sup> Sasaki *et al.* reported that there was no difference between the eating  
43  
44 304 speeds assessed by study subjects or by friends of the subjects.<sup>25</sup> In addition, our  
45  
46 305 findings are consistent with those of a previous study that used objective measures of  
47  
48 306 eating speed and found that slower eating speeds were associated with greater weight  
49  
50 307 loss.<sup>30</sup> Thirdly, we did not include an analysis of physical exercise and energy intake,  
51  
52 308 which may be potential confounders. Nevertheless, a previous analysis has reported  
53  
54 309 that eating speed was associated with obesity regardless of the level of physical  
55  
56 310 activity.<sup>26</sup> Other studies have also reported similar associations between eating speed

1  
2  
3 311 and BMI given similar overall food intake, which corroborates our findings.<sup>24,25</sup>  
4 312 Therefore, these 2 factors are unlikely to be confounders in this study despite their  
5  
6 313 association with BMI. Finally, the sample comprised relatively health-conscious  
7  
8 314 individuals who voluntarily participated in health checkups. The findings may  
9  
10 315 therefore have limited applicability to less health-conscious people.

11  
12 316 Many studies have shown that eating habits are associated with BMI and weight  
13  
14 317 gain.<sup>7,8,18-31</sup> However, this study utilized panel data to show that changes in eating  
15  
16 318 habits have a strong relationship with obesity and BMI. These findings indicate that  
17  
18 319 weight loss can be supported through the reduction of eating speed, the cessation of  
19  
20 320 eating dinner within 2 hours before sleeping, the cessation of snacking after dinner,  
21  
22 321 and consistently having breakfast.

23  
24 322

### 25 26 323 **Conclusions**

27  
28 324 Changes in eating habits can affect obesity and BMI. Interventions aimed at altering  
29  
30 325 eating habits, such as education initiatives and programs to reduce eating speed, may  
31  
32 326 be useful in preventing obesity and reducing the risk of noncommunicable diseases.

33  
34 327  
35  
36  
37  
38  
39  
40  
41  
42  
43  
44  
45  
46  
47  
48  
49  
50  
51  
52  
53  
54  
55  
56  
57  
58  
59  
60

1  
2  
3 328 **Funding:**

4 329 This work was supported by Grant-in-Aid for Health Sciences Research by the  
5  
6 330 Ministry of Health, Labour and Welfare of Japan (Grant Number H29-Seisaku-Shitei-  
7  
8 331 010)

9  
10 332

11  
12 333 **Competing interests:**

13  
14 334 No potential conflicts of interest relevant to this article were reported.  
15

16 335

17  
18 336 **Author contributions:**

19  
20 337 YH contributed to data analysis and interpretation, and drafting of the manuscript. HF  
21  
22 338 contributed to the study concept, design, and interpretation, and drafting of the  
23  
24 339 manuscript.  
25

26 340

27  
28 341 **Ethics approval:**

29  
30 342 This study was approved by the ethics committee of the Japan Medical Data Center.  
31

32 343

33  
34 344 **Data sharing statement:**

35  
36 345 No additional data are available.  
37

38  
39 346  
40  
41  
42  
43  
44  
45  
46  
47  
48  
49  
50  
51  
52  
53  
54  
55  
56  
57  
58  
59  
60

## 347 **References**

- 348 1. World Health Organization. Media centre, obesity and overweight.  
349 <http://www.who.int/mediacentre/factsheets/fs311/en/> [Accessed: August 19, 2017]
- 350 2. Oh SW, Shin SA, Yun YH, *et al.* Cut-off point of BMI and obesity-related  
351 comorbidities and mortality in middle-aged Koreans. *Obes Res* 2004; 12: 2031-40.
- 352 3. Yoon KH, Lee JH, Kim JW, *et al.* Epidemic obesity and type 2 diabetes in Asia,  
353 *Lancet* 2006; 368: 1681-8.
- 354 4. Huxley R, Mendis S, Zheleznyakov E, *et al.* Body mass index, waist circumference  
355 and waist:hip ratio as predictors of cardiovascular risk. *Eur J Clin Nutr* 2010; 64:  
356 16-22.
- 357 5. Matsushita Y, Takahashi Y, Mizoue T, *et al.* Overweight and obesity trends among  
358 Japanese adults: a 10-year follow-up of the JPHC Study. *Int J Obes* 2008; 32: 1861-7.
- 359 6. Ministry of Health, Labour and Welfare. Annual Health, Labour and Welfare Report  
360 2013-2014. Toward the Realization of a Society of Health and Longevity: The First  
361 Year of Health and Prevention.  
362 <http://www.mhlw.go.jp/wp/hakusyo/kousei/14/backdata/> [Accessed: August 19, 2017]
- 363 7. Ashizawa E, Katano S, Harada A, *et al.* Exploring the link between standard lifestyle  
364 questionnaires administered during specific medical check-ups and incidence of  
365 metabolic syndrome in Chiba Prefecture. *Nihon Kosho Eisei Zasshi* 2014; 61(4): 176-  
366 85.
- 367 8. Zhu B, Haruyama Y, Muto T, *et al.* Association Between Eating Speed and Metabolic  
368 Syndrome in a Three-Year Population-Based Cohort Study. *J Epidemiol* 2015; 25:  
369 332-6.
- 370 9. Horikawa C, Kodama S, Yachi Y, *et al.* Skipping breakfast and prevalence of  
371 overweight and obesity in Asian and Pacific regions: A meta-analysis. *Prev Med*  
372 2011; 53: 260-7.
- 373 10. Ferrie JE, Kivimäki M, Akbaraly TN, *et al.* Change in Sleep Duration and Type 2  
374 Diabetes: The Whitehall II Study. *Diabetes Care* 2015; 38: 1467-72.
- 375 11. Tamura T, Kimura Y. Specific health checkups in Japan: The present situation

- 1  
2  
3 376 analyzed using 5-year statistics and the future. *Biomed Eng Lett* 2015; 5: 22-8.
- 4 377 12. Health Service Bureau, the Ministry of Health, Labour and Welfare. Standard Health  
5  
6 378 Checkup and Counseling Guidance Program (Revised Version).  
7  
8 379 [http://www.mhlw.go.jp/stf/seisakunitsuite/bunya/kenkou\\_iryuu/kenkou/seikatsu/](http://www.mhlw.go.jp/stf/seisakunitsuite/bunya/kenkou_iryuu/kenkou/seikatsu/)  
9  
10 380 [Accessed: August 19, 2017]
- 11  
12 381 13. Yoshiike N, Nishi N, Matsushima S, *et al.* Relationship between the severity of  
13  
14 382 obesity based on body mass index and the risk factors for diabetes, hypertension, and  
15  
16 383 hyperglycemia: a multicenter epidemiological study. *Obesity Research* 2000; 6: 4-17.  
17  
18 384 [in Japanese]
- 19  
20 385 14. Waki K, Noda M, Sasaki S, *et al.* Alcohol consumption and other risk factors for  
21  
22 386 self-reported diabetes among middle-aged Japanese: a population-based prospective  
23  
24 387 study in the JPHC study cohort I. *Diabetic Medicine* 2005; 22(3): 323-31.
- 25  
26 388 15. WHO Expert Consultation. Public health appropriate body-mass index for Asian  
27  
28 389 populations and its implications for policy and intervention strategies. *Lancet* 2004;  
29  
30 390 363: 157-63.
- 31  
32 391 16. Saito Y, Shirai K, Nakamura T, *et al.* Diagnostic criteria for obesity 2011. *Obesity*  
33  
34 392 *Research* 2011; 7: s1-s78 [in Japanese]
- 35  
36 393 17. Kitamura Y. Meanings of panel data and its use. *The Japanese Journal of Labour*  
37  
38 394 *Studies* 2006; 551: 6-16 [in Japanese]
- 39  
40 395 18. Totsuka K, Maeno T, Saito K, *et al.* Self-reported fast eating is a potent predictor of  
41  
42 396 development of impaired glucose tolerance in Japanese men and women: Tsukuba  
43  
44 397 Medical Center Study. *Diabetes Res Clin Pract* 2011; 94: e72-e74.
- 45  
46 398 19. Otsuka R, Tamakoshi K, Yatsuya H, *et al.* Eating fast leads to insulin resistance:  
47  
48 399 findings in middle-aged Japanese men and women. *Prev Med* 2008; 46: 154-9.
- 49  
50 400 20. Sakurai M, Nakamura K, Miura K, *et al.* Self-reported speed of eating and 7-year  
51  
52 401 risk of type2 diabetes mellitus in middle-aged Japanese men. *Metabolism* 2012; 61:  
53  
54 402 1566-71.
- 55  
56 403 21. Yamane M, Ekumi D, Kataoka K, *et al.* Relationships between eating quickly and  
57  
58 404 weight gain in Japanese university students: a longitudinal study. *Obesity* 2014; 22:

- 1  
2  
3 405 2262-6.  
4  
5 406 22. Tanihara S, Imatoh T, Miyazaki M, *et al.* Retrospective longitudinal study on the  
6  
7 407 relationship between 8-year weight change and current eating speed. *Appetite* 2011;  
8  
9 408 57: 179-83.  
10  
11 409 23. Oya J, Nakagami T, Sasaki S, *et al.* Characteristics of nutritional intake and exercise  
12  
13 410 habits according to classifications of the Standard Health Checkup and Counseling  
14  
15 411 Guidance Program: an analysis of Kurihara Lifestyle Cohort Study data. *The Journal*  
16  
17 412 *of Metabolism and Clinical Nutrition* 2011; 14: 25-32. [in Japanese]  
18  
19 413 24. Otsuka R, Tamakoshi K, Yatsuya H, *et al.* Eating fast leads to obesity Findings based  
20  
21 414 on self-administered questionnaires among middle-aged Japanese men and women. *J*  
22  
23 415 *Epidemiol* 2006; 16: 117-24.  
24  
25 416 25. Sasaki S, Katagiri A, Tsuji T, *et al.* Self-reported rate of eating correlates with body  
26  
27 417 mass index in 18-y-old Japanese women. *Int J Obes Relat Metab Disord* 2003; 27:  
28  
29 418 1405-10.  
30  
31 419 26. Momose Y, Une H, Hayashi M, *et al.* Habit of eating quickly is independently related  
32  
33 420 with overweight among Japanese rural residents aged 40-79 years. *Journal of the*  
34  
35 421 *Japanese Association of Rural Medicine* 2010; 58; 533-40. [in Japanese]  
36  
37 422 27. Maruyama K, Sato S, Ohira T, *et al.* The joint impact on being overweight of self  
38  
39 423 reported behaviours of eating quickly and eating until full: cross sectional study.  
40  
41 424 *BMJ* 2008; 337: a2002.  
42  
43 425 28. Andrade AM, Greene GW, Melanson KJ. Eating slowly led to decreases in energy  
44  
45 426 intake within meals in healthy women. *J Am Diet Assoc* 2008; 108: 1186-91.  
46  
47 427 29. Martin CK, Anton SD, Walden H, *et al.* Slower eating rate reduces the food intake of  
48  
49 428 men, but not women: Implications for behavioral weight control. *Behav Res Ther*  
50  
51 429 2007; 45: 2349-59.  
52  
53 430 30. Spiegel TA, Wadden TA, Foster GD. Objective measurement of eating rate during  
54  
55 431 behavioral treatment of obesity. *Behav Ther* 1991; 22: 61-7.  
56  
57 432 31. Ochiai H, Shirasawa T, Ohtsu T, *et al.* The impact of eating quickly on  
58  
59 433 anthropometric variables among schoolgirls: A prospective cohort study in Japan.  
60

- 1  
2  
3 434 *Eur J Public Health* 2014; 24: 691-5.
- 4  
5 435 32. Cerhan JR, Moore SC, Jacobs EJ, *et al.* A pooled analysis of waist circumference and  
6  
7 436 mortality in 650,000 adults. *Mayo Clinic Proceedings* 2014; 89(3): 335-45.
- 8  
9 437 33. Odegaard AO, Jacobs DR Jr, Steffen LM, *et al.* Breakfast frequency and development  
10  
11 438 of metabolic risk. *Diabetes Care* 2013; 36: 3100-6.
- 12  
13 439 34. Smith KJ, Gall SL, McNaughton SA, *et al.* Skipping breakfast: longitudinal  
14  
15 440 associations with cardiometabolic risk factors in the Childhood Determinants of  
16  
17 441 Adult Health Study. *Am J Clin Nutr* 2010; 92: 1316-25.
- 18  
19 442 35. Dorn JM, Hovey K, Muti P, *et al.* Alcohol drinking patterns differentially affect  
20  
21 443 central adiposity as measured by abdominal height in women and men. *J Nutr* 2003;  
22  
23 444 133: 2655-62.
- 24  
25 445 36. Tolstrup JS, Halkjaer J, Heitmann BL, *et al.* Alcohol drinking frequency in relation  
26  
27 446 to subsequent changes in waist circumference. *Am J Clin Nutr* 2008; 87: 957-63.
- 28  
29 447 37. Tolstrup JS, Heitmann BL, Tjønneland AM, *et al.* The relation between drinking  
30  
31 448 pattern and body mass index and waist and hip circumference. *Int J Obes* 2005; 29:  
32  
33 449 490-7.
- 34  
35 450 38. Lee J, Choi YS, Jeong YJ, *et al.* Poor-quality sleep is associated with metabolic  
36  
37 451 syndrome in Korean adults. *Tohoku J Exp Med* 2013; 231: 281-91.
- 38  
39 452 39. Nishiura C, Hashimoto H. A 4-year study of the association between short sleep  
40  
41 453 duration and change in body mass index in Japanese male workers. *J Epidemiol*  
42  
43 454 2010; 20: 385-90.
- 44  
45 455 40. Taheri S, Lin L, Austin D, *et al.* Short sleep duration is associated with reduced  
46  
47 456 leptin, elevated ghrelin, and increased body mass index. *PLoS Med* 2004; 1: e62.
- 48  
49 457 41. Lundahl A, Nelson T. Sleep and food intake: A multisystem review of mechanisms in  
50  
51 458 children and adults. *J Health Psychol* 2015; 20: 794-805.
- 52  
53 459 42. Sogabe N, Maruyama R, Sato K, *et al.* Relationships between smoking and eating  
54  
55 460 habits or behavior in male students. *Nihon Koshu Eisei Zasshi* 2008;55:30-6. [in  
56  
57 461 Japanese]



1  
2  
3  
4  
5  
6  
7  
8  
9  
10  
11  
12  
13  
14  
15  
16  
17  
18  
19  
20  
21  
22  
23  
24  
25  
26  
27  
28  
29  
30  
31  
32  
33  
34  
35  
36  
37  
38  
39  
40  
41  
42  
43  
44  
45  
46  
47  
48  
49  
50  
51  
52  
53  
54  
55  
56  
57  
58  
59  
60

462 43. Yamauchi T, Takaki M, Tonai M. Images and recognition about "eating quickly". *The*  
463 *Journal of Japan Society for Health Care Management* 2003; 4(2): 311-318. [in  
464 Japanese]  
465

For peer review only

466 **Table 1. Distribution of baseline characteristics according to eating speed**

|                                                                   | Eating Speed         |                        |                     | P                   |
|-------------------------------------------------------------------|----------------------|------------------------|---------------------|---------------------|
|                                                                   | Fast<br>(n = 22,062) | Normal<br>(n = 33,460) | Slow<br>(n = 4,191) |                     |
| Number of checkups                                                | 4.2 [1.5]            | 4.2 [1.6]              | 4.4 [1.6]           | <0.001 <sup>b</sup> |
| Women                                                             | 6,023<br>(27.3%)     | 12,213<br>(36.5%)      | 1,861<br>(44.4%)    | <0.001 <sup>a</sup> |
| Age                                                               | 46.6 [10.4]          | 48.1 [10.6]            | 46.5 [11.7]         | <0.001 <sup>b</sup> |
| Use of anti-diabetic medications                                  | 13,648<br>(61.8%)    | 20,074<br>(60%)        | 2,525<br>(60.2%)    | <0.001 <sup>a</sup> |
| BMI, kg/m <sup>2</sup>                                            | 25 [4.4]             | 23.4 [4.0]             | 22.3 [4.0]          | <0.001 <sup>b</sup> |
| Obese (BMI ≥25)                                                   | 9,884<br>(44.8%)     | 9,886<br>(29.6%)       | 901<br>(21.5%)      | <0.001 <sup>a</sup> |
| Eating dinner within 2 hours before<br>sleeping ≥3 times per week | 9,545<br>(43.3%)     | 11,161<br>(33.4%)      | 1,541<br>(36.8%)    | <0.001 <sup>a</sup> |
| Snacking after dinner ≥3 times per week                           | 4,247<br>(19.2%)     | 4,851<br>(14.5%)       | 809<br>(19.3%)      | <0.001 <sup>a</sup> |
| Skipping breakfast ≥3 times per week                              | 4,599<br>(20.8%)     | 5,542<br>(16.6%)       | 794<br>(18.9%)      | <0.001 <sup>a</sup> |
| Alcohol consumption                                               |                      |                        |                     |                     |
| Every day                                                         | 5,695<br>(25.8%)     | 8,810<br>(26.3%)       | 955<br>(22.8%)      | <0.001 <sup>a</sup> |
| Occasionally                                                      | 7,233<br>(32.8%)     | 10,398<br>(31.1%)      | 1,152<br>(27.5%)    | <0.001 <sup>a</sup> |
| Rarely or never                                                   | 9,142<br>(41.4%)     | 14,247<br>(42.6%)      | 2,085<br>(49.7%)    | <0.001 <sup>a</sup> |
| Obtain adequate sleep                                             | 10,834<br>(49.1%)    | 18,437<br>(55.1%)      | 2,238<br>(53.4%)    | <0.001 <sup>a</sup> |
| Habitual smoker                                                   | 7,140<br>(32.4%)     | 10,239<br>(30.6%)      | 1,146<br>(27.3%)    | <0.001 <sup>a</sup> |

<sup>a</sup>  $\chi^2$  test

<sup>b</sup> One-way analysis of variance

Values for number of checkups, age, and BMI are presented as mean [standard deviation]. All other values are presented as number of subjects (proportion of each eating-speed group).

Abbreviation: BMI, body mass index.

472 **Table 2. Estimated odds ratios of the determinants of obesity derived from the**  
 473 **generalized estimating equation model**

|                                                                      | <b>Odds Ratio</b> | <b>95% Confidence Intervals</b> | <b>P</b> |
|----------------------------------------------------------------------|-------------------|---------------------------------|----------|
| Eating speed                                                         |                   |                                 |          |
| Fast                                                                 | REF               |                                 |          |
| Normal                                                               | 0.71              | 0.68 - 0.75                     | <0.001   |
| Slow                                                                 | 0.58              | 0.54 - 0.63                     | <0.001   |
| Eating dinner within 2 hours before sleeping $\geq 3$ times per week |                   |                                 |          |
| Yes                                                                  | REF               |                                 |          |
| No                                                                   | 0.90              | 0.86 - 0.94                     | <0.001   |
| Snacking after dinner $\geq 3$ times per week                        |                   |                                 |          |
| Yes                                                                  | REF               |                                 |          |
| No                                                                   | 0.85              | 0.80 - 0.90                     | <0.001   |
| Skipping breakfast $\geq 3$ times per week                           |                   |                                 |          |
| Yes                                                                  | REF               |                                 |          |
| No                                                                   | 0.92              | 0.87 - 0.97                     | 0.003    |
| Alcohol consumption                                                  |                   |                                 |          |
| Every day                                                            | REF               |                                 |          |
| Occasionally                                                         | 1.18              | 1.12 - 1.25                     | <0.001   |
| Rarely or never                                                      | 1.22              | 1.16 - 1.29                     | <0.001   |
| Obtain adequate sleep                                                |                   |                                 |          |
| Yes                                                                  | REF               |                                 |          |
| No                                                                   | 1.06              | 1.02 - 1.11                     | 0.007    |
| Habitual smoker                                                      |                   |                                 |          |
| Yes                                                                  | REF               |                                 |          |
| No                                                                   | 1.10              | 1.05 - 1.15                     | <0.001   |
| Use of anti-diabetic medication                                      |                   |                                 |          |
| No                                                                   | REF               |                                 |          |
| Yes                                                                  | 1.02              | 0.98 - 1.07                     | 0.293    |
| Age                                                                  | 1.00              | 1.00 - 1.00                     | 0.076    |
| Female                                                               | 0.66              | 0.63 - 0.69                     | <0.001   |
| Obesity status in the previous checkup                               |                   |                                 |          |
| Not obese                                                            | REF               |                                 |          |
| Obese                                                                | 164.79            | 156.15 - 173.91                 | <0.001   |

474

475 **Table 3. Estimated coefficients of the determinants of changes in BMI derived**  
 476 **from the fixed-effects model**

|                                                                         | <b>Coefficient</b> | <b>95%<br/>Confidence<br/>Intervals</b> | <b>P</b> |
|-------------------------------------------------------------------------|--------------------|-----------------------------------------|----------|
| Eating speed                                                            |                    |                                         |          |
| Fast                                                                    | REF                |                                         |          |
| Normal                                                                  | -0.07              | -0.10, -0.05                            | <0.001   |
| Slow                                                                    | -0.11              | -0.15, -0.06                            | <0.001   |
| Eating dinner within 2 hours before sleeping $\geq 3$<br>times per week |                    |                                         |          |
| Yes                                                                     | REF                |                                         |          |
| No                                                                      | -0.06              | -0.08, -0.04                            | <0.001   |
| Snacking after dinner $\geq 3$ times per week                           |                    |                                         |          |
| Yes                                                                     | REF                |                                         |          |
| No                                                                      | -0.08              | -0.11, -0.06                            | <0.001   |
| Skipping breakfast $\geq 3$ times per week                              |                    |                                         |          |
| Yes                                                                     | REF                |                                         |          |
| No                                                                      | 0.00               | -0.03, 0.04                             | 0.818    |
| Alcohol consumption                                                     |                    |                                         |          |
| Every day                                                               | REF                |                                         |          |
| Occasionally                                                            | -0.10              | -0.13, -0.06                            | <0.001   |
| Rarely or never                                                         | -0.17              | -0.22, -0.13                            | 0.002    |
| Obtain adequate sleep                                                   |                    |                                         |          |
| Yes                                                                     | REF                |                                         |          |
| No                                                                      | -0.03              | -0.05, -0.01                            | 0.001    |
| Habitual smoker                                                         |                    |                                         |          |
| Yes                                                                     | REF                |                                         |          |
| No                                                                      | 0.23               | 0.20, 0.27                              | 0.363    |
| Use of anti-diabetic medication                                         |                    |                                         |          |
| No                                                                      | REF                |                                         |          |
| Yes                                                                     | -0.12              | -0.14, -0.10                            | 0.069    |
| Age                                                                     | 0.08               | 0.07, 0.10                              | 0.008    |
| BMI in the previous checkup                                             | 0.09               | 0.07, 0.10                              | <0.001   |

477 Abbreviation: BMI, body mass index.

STROBE Statement—checklist of items that should be included in reports of observational studies

|                              | Item No. | Recommendation                                                                                                                                                                                                                                                                                                                                                                                                                                                         | Page No.                        | Relevant text from manuscript |
|------------------------------|----------|------------------------------------------------------------------------------------------------------------------------------------------------------------------------------------------------------------------------------------------------------------------------------------------------------------------------------------------------------------------------------------------------------------------------------------------------------------------------|---------------------------------|-------------------------------|
| <b>Title and abstract</b>    | 1        | (a) Indicate the study’s design with a commonly used term in the title or the abstract                                                                                                                                                                                                                                                                                                                                                                                 | Page 1: Title                   |                               |
|                              |          | (b) Provide in the abstract an informative and balanced summary of what was done and what was found                                                                                                                                                                                                                                                                                                                                                                    | Page 2: Abstract                |                               |
| <b>Introduction</b>          |          |                                                                                                                                                                                                                                                                                                                                                                                                                                                                        |                                 |                               |
| Background/rationale         | 2        | Explain the scientific background and rationale for the investigation being reported                                                                                                                                                                                                                                                                                                                                                                                   | Page 4: Lines 72-77&Lines 84-86 |                               |
| Objectives                   | 3        | State specific objectives, including any prespecified hypotheses                                                                                                                                                                                                                                                                                                                                                                                                       | Page 4: Lines 90-92             |                               |
| <b>Methods</b>               |          |                                                                                                                                                                                                                                                                                                                                                                                                                                                                        |                                 |                               |
| Study design                 | 4        | Present key elements of study design early in the paper                                                                                                                                                                                                                                                                                                                                                                                                                | Page 5: Lines 111-120           |                               |
| Setting                      | 5        | Describe the setting, locations, and relevant dates, including periods of recruitment, exposure, follow-up, and data collection                                                                                                                                                                                                                                                                                                                                        | Page 4-5: Lines 95-109          |                               |
| Participants                 | 6        | (a) <i>Cohort study</i> —Give the eligibility criteria, and the sources and methods of selection of participants. Describe methods of follow-up<br><i>Case-control study</i> —Give the eligibility criteria, and the sources and methods of case ascertainment and control selection. Give the rationale for the choice of cases and controls<br><i>Cross-sectional study</i> —Give the eligibility criteria, and the sources and methods of selection of participants | Page 5: Lines 112-114           |                               |
|                              |          | (b) <i>Cohort study</i> —For matched studies, give matching criteria and number of exposed and unexposed<br><i>Case-control study</i> —For matched studies, give matching criteria and the number of controls per case                                                                                                                                                                                                                                                 | Not Applicable                  |                               |
| Variables                    | 7        | Clearly define all outcomes, exposures, predictors, potential confounders, and effect modifiers. Give diagnostic criteria, if applicable                                                                                                                                                                                                                                                                                                                               | Page 5-6: Lines 122-157         |                               |
| Data sources/<br>measurement | 8*       | For each variable of interest, give sources of data and details of methods of assessment (measurement). Describe comparability of assessment methods if there is more than one group                                                                                                                                                                                                                                                                                   | Page 4-5: Lines 95-109          |                               |
| Bias                         | 9        | Describe any efforts to address potential sources of bias                                                                                                                                                                                                                                                                                                                                                                                                              | Not Applicable                  |                               |
| Study size                   | 10       | Explain how the study size was arrived at                                                                                                                                                                                                                                                                                                                                                                                                                              | Not Applicable                  |                               |

Continued on next page

|                        |     |                                                                                                                                                                                                                    |                               |
|------------------------|-----|--------------------------------------------------------------------------------------------------------------------------------------------------------------------------------------------------------------------|-------------------------------|
| Quantitative variables | 11  | Explain how quantitative variables were handled in the analyses. If applicable, describe which groupings were chosen and why                                                                                       | Page 5-6: Lines 122-157       |
| Statistical methods    | 12  | (a) Describe all statistical methods, including those used to control for confounding                                                                                                                              | Page 7-8: Lines 159-179       |
|                        |     | (b) Describe any methods used to examine subgroups and interactions                                                                                                                                                | Not Applicable                |
|                        |     | (c) Explain how missing data were addressed                                                                                                                                                                        | Page 6: Lines 118-119         |
|                        |     | (d) <i>Cohort study</i> —If applicable, explain how loss to follow-up was addressed                                                                                                                                | Not Applicable                |
|                        |     | <i>Case-control study</i> —If applicable, explain how matching of cases and controls was addressed<br><i>Cross-sectional study</i> —If applicable, describe analytical methods taking account of sampling strategy | Not Applicable                |
|                        |     | (e) Describe any sensitivity analyses                                                                                                                                                                              | Not Applicable                |
| <b>Results</b>         |     |                                                                                                                                                                                                                    |                               |
| Participants           | 13* | (a) Report numbers of individuals at each stage of study—eg numbers potentially eligible, examined for eligibility, confirmed eligible, included in the study, completing follow-up, and analysed                  | Page 6: Lines 181-187         |
|                        |     | (b) Give reasons for non-participation at each stage                                                                                                                                                               | Not Applicable                |
|                        |     | (c) Consider use of a flow diagram                                                                                                                                                                                 | Not Applicable                |
| Descriptive data       | 14* | (a) Give characteristics of study participants (eg demographic, clinical, social) and information on exposures and potential confounders                                                                           | Page 20: Table 1              |
|                        |     | (b) Indicate number of participants with missing data for each variable of interest                                                                                                                                | Page 20: Lines 181-187        |
|                        |     | (c) <i>Cohort study</i> —Summarise follow-up time (eg, average and total amount)                                                                                                                                   | Page 20: Line 183-184         |
| Outcome data           | 15* | <i>Cohort study</i> —Report numbers of outcome events or summary measures over time                                                                                                                                | Page 20: Table 1              |
|                        |     | <i>Case-control study</i> —Report numbers in each exposure category, or summary measures of exposure                                                                                                               | Page 20: Table 1              |
|                        |     | <i>Cross-sectional study</i> —Report numbers of outcome events or summary measures                                                                                                                                 | Page 20: Table 1              |
| Main results           | 16  | (a) Give unadjusted estimates and, if applicable, confounder-adjusted estimates and their precision (eg, 95% confidence interval). Make clear which confounders were adjusted for and why they were included       | Page 21-22: Table 2 & Table 3 |
|                        |     | (b) Report category boundaries when continuous variables were categorized                                                                                                                                          | Page 7: Lines 145-157         |
|                        |     | (c) If relevant, consider translating estimates of relative risk into absolute risk for a meaningful time period                                                                                                   | Not Applicable                |

Continued on next page

1  
2  
3  
4  
5  
6  
7  
8  
9  
10  
11  
12  
13  
14  
15  
16  
17  
18  
19  
20  
21  
22  
23  
24  
25  
26  
27  
28  
29  
30  
31  
32  
33  
34  
35  
36  
37  
38  
39  
40  
41  
42  
43  
44  
45  
46  
47

|                          |    |                                                                                                                                                                            |                           |
|--------------------------|----|----------------------------------------------------------------------------------------------------------------------------------------------------------------------------|---------------------------|
| Other analyses           | 17 | Report other analyses done—eg analyses of subgroups and interactions, and sensitivity analyses                                                                             | Not Applicable            |
| <b>Discussion</b>        |    |                                                                                                                                                                            |                           |
| Key results              | 18 | Summarise key results with reference to study objectives                                                                                                                   | Page 9-10: Lines 221-229  |
| Limitations              | 19 | Discuss limitations of the study, taking into account sources of potential bias or imprecision. Discuss both direction and magnitude of any potential bias                 | Page 12-13: Lines 291-311 |
| Interpretation           | 20 | Give a cautious overall interpretation of results considering objectives, limitations, multiplicity of analyses, results from similar studies, and other relevant evidence | Page 10: Lines 239-252    |
| Generalisability         | 21 | Discuss the generalisability (external validity) of the study results                                                                                                      | Page 12: Lines 291-295    |
| <b>Other information</b> |    |                                                                                                                                                                            |                           |
| Funding                  | 22 | Give the source of funding and the role of the funders for the present study and, if applicable, for the original study on which the present article is based              | Page 14: Lines 324-326    |

\*Give information separately for cases and controls in case-control studies and, if applicable, for exposed and unexposed groups in cohort and cross-sectional studies.

**Note:** An Explanation and Elaboration article discusses each checklist item and gives methodological background and published examples of transparent reporting. The STROBE checklist is best used in conjunction with this article (freely available on the Web sites of PLoS Medicine at <http://www.plosmedicine.org/>, Annals of Internal Medicine at <http://www.annals.org/>, and Epidemiology at <http://www.epidem.com/>). Information on the STROBE Initiative is available at [www.strobe-statement.org](http://www.strobe-statement.org).

# BMJ Open

## The effects of changes in eating speed on obesity in patients with diabetes: a secondary analysis of longitudinal health checkup data

|                                 |                                                                                                                                                                                    |
|---------------------------------|------------------------------------------------------------------------------------------------------------------------------------------------------------------------------------|
| Journal:                        | <i>BMJ Open</i>                                                                                                                                                                    |
| Manuscript ID                   | bmjopen-2017-019589.R2                                                                                                                                                             |
| Article Type:                   | Research                                                                                                                                                                           |
| Date Submitted by the Author:   | 09-Dec-2017                                                                                                                                                                        |
| Complete List of Authors:       | Hurst, Yumi; Kyushu University, Department of Health Care Administration and Management<br>Fukuda , H ; Kyushu University, Department of Health Care Administration and Management |
| <b>Primary Subject Heading</b>: | Public health                                                                                                                                                                      |
| Secondary Subject Heading:      | Epidemiology                                                                                                                                                                       |
| Keywords:                       | PUBLIC HEALTH, obesity, Body mass index, eating habits, health checkups                                                                                                            |
|                                 |                                                                                                                                                                                    |

SCHOLARONE™  
Manuscripts



1  
2  
3 1  
4  
5 2  
6  
7 3 **The effects of changes in eating speed on obesity in patients with diabetes:**  
8  
9 4 **a secondary analysis of longitudinal health checkup data**  
10  
11 5

12  
13 6 Hurst Y, Fukuda H.  
14  
15 7

16  
17 8 Department of Health Care Administration and Management,  
18  
19 9 Kyushu University Graduate School of Medical Sciences  
20  
21 10 3-1-1, Maidashi, Higashi-ku, Fukuoka, 812-8582, Japan  
22  
23 11

24 12  
25 13  
26 13 ***Corresponding Author***

27 14 **Haruhisa Fukuda, MPH, PhD**

28  
29 15 *Department of Health Care Administration and Management,*

30 16 *Kyushu University Graduate School of Medical Sciences*

31 17 3-1-1 Maidashi Higashi-ku Fukuoka 812-8582, Japan

32 18 Phone: +81-92-642-6956 Fax: +81-92-642-6961

33 19 Email address: h\_fukuda@hcam.med.kyushu-u.ac.jp  
34  
35  
36  
37 20  
38  
39 21  
40  
41  
42  
43  
44  
45  
46  
47  
48  
49  
50  
51  
52  
53  
54  
55  
56  
57  
58  
59  
60

1  
2  
3 22 **Abstract**

4 23 **Objective** Few studies have examined the causal relationships between lifestyle  
5  
6 24 habits and obesity. With a focus on eating speed in patients with type 2 diabetes, this  
7  
8 25 study aimed to analyze the effects of changes in lifestyle habits on changes in obesity  
9  
10 26 utilizing panel data.

11  
12 27 **Methods** Patient-level panel data from 2008 to 2013 were generated using  
13  
14 28 commercially available insurance claims data and health checkup data. The study  
15  
16 29 subjects comprised Japanese men and women (n=59,717) enrolled in health insurance  
17  
18 30 societies who had been diagnosed with type 2 diabetes during the study period. Body  
19  
20 31 mass index (BMI) was measured, and obesity was defined as a BMI of 25 or more.  
21  
22 32 Information on lifestyle habits were obtained from the subjects' responses to  
23  
24 33 questions asked during health checkups. The main exposure of interest was eating  
25  
26 34 speed ("fast", "normal", and "slow"). Other lifestyle habits included eating dinner  
27  
28 35 within 2 hours of sleeping, after-dinner snacking, skipping breakfast, alcohol  
29  
30 36 consumption frequency, sleep adequacy, and tobacco consumption. A generalized  
31  
32 37 estimating equation model was used to examine the effects of these habits on obesity.  
33  
34 38 In addition, fixed-effects models were used to assess these effects on BMI and waist  
35  
36 39 circumference.

37  
38 40 **Results** The generalized estimating equation model showed that eating slower  
39  
40 41 inhibited the development of obesity. The odds ratios for slow (0.58) and normal-  
41  
42 42 speed eaters (0.71) indicated that these groups were less likely to be obese than fast  
43  
44 43 eaters ( $P < 0.001$ ). Similarly, the fixed-effects models showed that eating slower  
45  
46 44 reduced BMI and waist circumference. Relative to fast eaters, the coefficients of the  
47  
48 45 BMI model for slow and normal-speed eaters were -0.11 and -0.07, respectively ( $P <$   
49  
50 46 0.001).

51  
52 47 **Discussion** Changes in eating speed can affect changes in obesity, BMI, and waist  
53  
54 48 circumference. Interventions aimed at reducing eating speed may be effective in  
55  
56 49 preventing obesity and lowering the associated health risks.

1  
2  
3 50  
4  
5 51  
6  
7 52  
8  
9  
10  
11  
12  
13  
14  
15  
16  
17  
18  
19  
20  
21  
22  
23  
24  
25  
26  
27  
28  
29  
30  
31  
32  
33  
34  
35  
36  
37  
38  
39  
40  
41  
42  
43  
44  
45  
46  
47  
48  
49  
50  
51  
52  
53  
54  
55  
56  
57  
58  
59  
60

**Keywords:** Body mass index, obesity, eating habits, health checkups

For peer review only

1  
2  
3 **53 Strengths and limitations of this study**

- 4  
5 54 1. This is the first panel data analysis to verify the effects of changes in eating  
6  
7 55 habits on obesity.  
8  
9 56 2. Long-term large-scale longitudinal data were used.  
10  
11 57 3. Lifestyle habits were self-assessed and may be vulnerable to reporting bias.  
12  
13 58 4. The sample comprised relatively health-conscious individuals who voluntarily  
14  
15 59 participated in health checkups, and the findings may therefore have limited  
16  
17 60 applicability to less health-conscious people.

18  
19 61

## 62 **Introduction**

63 Excess body weight and obesity can lead to an increased risk of developing  
64 noncommunicable diseases such as diabetes, cardiovascular disease, and various  
65 forms of cancer.<sup>1-4</sup> Studies have reported that the regulation of body weight can be  
66 effective in lowering these health risks.<sup>1-4</sup> However, a 10-year longitudinal study of  
67 Japanese men aged 40 to 69 years found that the proportion of overweight and obese  
68 individuals had increased over the study period.<sup>5</sup> In addition, the Japanese  
69 government's *Annual Health, Labour and Welfare Report 2014* noted that the  
70 prevalence of obesity continues to rise, with a substantially higher prevalence among  
71 men in 2012 than in 1982.<sup>6</sup> The report also revealed that obesity prevalence exceeded  
72 30% in men in their 40s and 50s. These figures suggest that current obesity  
73 prevention efforts in Japan may be inadequate.

74 The fundamental cause of excess weight gain is the failure to ensure a balance  
75 between energy intake and energy expenditure.<sup>1</sup> However, recent studies have  
76 reported that excess weight gain and metabolic syndrome are affected not only by  
77 energy intake, but are also influenced by other factors such as eating speed, eating  
78 frequency, and other lifestyle habits.<sup>7-10</sup> In addition to emphasizing the importance of  
79 balancing energy intake and expenditure, these other factors represent possible targets  
80 for obesity prevention measures.

81 In response to the rising prevalence of obesity, Japan's Ministry of Health,  
82 Labour and Welfare introduced a nationwide health screening program (Standard  
83 Health Checkup and Counseling Guidance Program) to detect risk factors for obesity  
84 and metabolic syndrome.<sup>11,12</sup> Under this program, insurers conduct "specific health  
85 checkups" aimed at insurance enrollees aged 40 years or older. However, participation  
86 in these checkups is not mandatory.

87 Although many studies have addressed the associations between lifestyle habits  
88 and obesity, few have examined the causal effects of changes in lifestyle habits on  
89 obesity. In addition, studies from Japan have shown that the number of persons with

1  
2  
3 90 type 2 diabetes has increased with increasing BMI<sup>13</sup>, and that BMI is an independent  
4  
5 91 risk factor for this condition<sup>14</sup>. This study focuses on persons with type 2 diabetes as  
6  
7 92 they are likely to benefit directly from health improvements arising from the  
8  
9 93 alleviation of obesity. The main objective of this study was to utilize panel data to  
10  
11 94 analyze the effects of changes in eating speed and other lifestyle habits on obesity in  
12  
13 95 patients with type 2 diabetes. For this analysis, we hypothesized that slower eating  
14  
15 96 speeds would reduce obesity.

16  
17 97

## 18 98 **Methods**

### 19 99 **Data source**

20  
21  
22 100 This study used a commercial database obtained from the Japan Medical Data Center  
23  
24 101 (JMDC), a for-profit organization that collects, curates, and distributes health-related  
25  
26 102 data. The database comprised insurance claims data and health checkup data for  
27  
28 103 insurance enrollees and their dependents that were collected through JMDC's  
29  
30 104 contracts with several health insurance societies in Japan. The claims data included  
31  
32 105 information on the dates of consultations and treatments, sex, age, diagnoses, specific  
33  
34 106 treatments, and healthcare expenditure. The health checkup data included the dates of  
35  
36 107 checkups, body mass index (BMI), waist circumference, blood pressure, and the  
37  
38 108 results of blood chemical analysis, liver function test, blood glucose test, and  
39  
40 109 urinalysis. The health checkup data also included the subjects' responses to several  
41  
42 110 questions regarding lifestyle factors, such as eating habits, alcohol consumption,  
43  
44 111 tobacco use, and sleeping habits.<sup>12</sup> The claims data and health checkup data were  
45  
46 112 linked at the individual subject level for analysis. Approval for this study (No. 18-09-  
47  
48 113 2014) was obtained from the ethics committee of the JMDC.

49  
50 114

### 51 115 **Study design**

52  
53  
54 116 We first identified subjects with at least one recorded diagnosis of type 2 diabetes in  
55  
56 117 their claims data from January 2005 to June 2013 using the corresponding

1  
2  
3 118 International Classification of Diseases, 10th revision codes (E10–E14). Both the  
4  
5 119 claims data and health checkup data from this study period were used in the analysis.  
6  
7 120 From the claims data, we obtained information on subject sex, age, and the starting  
8  
9 121 date of anti-diabetic medication. The claims data were linked with the health checkup  
10  
11 122 data at the patient-month level to generate panel data. We excluded subjects with  
12  
13 123 missing data for BMI and lifestyle habits. The results from each subject's first  
14  
15 124 specific health checkup during the study period were used as the baseline values.  
16  
17 125

### 18 126 **Outcomes**

19  
20 127 The primary outcome of this study was obesity status. According to the World Health  
21  
22 128 Organization's criteria, a BMI of 25 or more indicates that a person is overweight,  
23  
24 129 and a BMI of 30 or more indicates obesity. However, it has been proposed that these  
25  
26 130 BMI cut-off points should be lower for Asian populations.<sup>15</sup> The Japan Society for the  
27  
28 131 Study of Obesity has recommended that obesity be defined by a BMI of 25 or more  
29  
30 132 for the Japanese population.<sup>16</sup> In accordance with this recommendation, our study  
31  
32 133 uses a BMI cut-off point of 25 to identify obese individuals. The secondary outcomes  
33  
34 134 of this study were BMI and waist circumference, which were analyzed as continuous  
35  
36 135 variables.  
37  
38 136

### 39 137 **Exposure variables**

40  
41  
42 138 The exposure variables consisted of the 7 question items regarding lifestyle habits.  
43  
44 139 The main exposure of interest was eating speed. The other items were eating dinner  
45  
46 140 within 2 hours before sleeping for 3 times or more per week, snacking after dinner for  
47  
48 141 3 times or more per week, skipping breakfast 3 times or more per week, alcohol  
49  
50 142 consumption frequency, sleep adequacy, and habitual smoking. These variables were  
51  
52 143 analyzed as categorical variables based on the response options. Eating speed was  
53  
54 144 analyzed as 3 categories ("fast", "normal", and "slow"). Eating dinner within 2 hours  
55  
56 145 before sleeping for 3 times or more per week, snacking after dinner for 3 times or  
57

1  
2  
3 146 more per week, skipping breakfast 3 times or more per week, adequate sleep, and  
4 147 habitual smoking were analyzed as 2 categories (“yes” and “no”). Alcohol  
5  
6 148 consumption frequency was analyzed as 3 categories (“every day”, “occasionally”,  
7  
8 149 and “rarely or never”).  
9

10  
11 150

### 12 151 **Covariates**

13  
14 152 The covariates were selected from factors thought to influence lifestyle habits and  
15  
16 153 weight management. These included the use of anti-diabetic medication (as an  
17  
18 154 indicator of diabetes that requires pharmacologic treatment), age, as well as obesity  
19  
20 155 status and BMI in the previous checkup. The use or non-use of anti-diabetic  
21  
22 156 medication was determined based on whether the patient had been administered anti-  
23  
24 157 diabetic medication at the time of each health checkup. This variable was analyzed as  
25  
26 158 2 categories (“yes” and “no”). In addition to human insulin preparations and insulin  
27  
28 159 analogs, anti-diabetic medications also included sulfonylureas, biguanide derivatives,  
29  
30 160 glitazones,  $\alpha$ -glucosidase inhibitors, glinides, DPP-4 inhibitors, and GLP-1 receptor  
31  
32 161 agonists. Age and BMI in the previous checkup were analyzed as continuous variables.  
33  
34 162 Obesity status in the previous checkup was analyzed as 2 categories (“yes” for BMI  
35  
36 163  $\geq 25$  and “no” for BMI  $< 25$ ).  
37

38 164

### 39 165 **Statistical analysis**

40  
41  
42 166 The subject baseline characteristics of sex, age, BMI, obesity status, waist  
43  
44 167 circumference, and lifestyle habits were compared among the 3 eating speed  
45  
46 168 categories using the  $\chi^2$  test or one-way analysis of variance. Patient-level panel data  
47  
48 169 were generated using repeated estimates from multiple health checkups. This study  
49  
50 170 used longitudinal data from annual health checkups collected over approximately 6  
51  
52 171 years. The application of panel data enables the estimation of changes in the  
53  
54 172 dependent variables that result from changes in eating speed (e.g., fast to fast, fast to  
55  
56 173 normal, fast to slow, and so on) in individual subjects.  
57



1  
2  
3 174 We first constructed a generalized estimating equation model to elucidate the  
4  
5 175 effects of changes in eating speed on obesity. The exposure variables were the 7  
6  
7 176 lifestyle habit items, and the covariates were the use of anti-diabetic medication, age,  
8  
9 177 sex, and obesity status in the previous checkup.

10  
11 178 In order to estimate the influence of changes in eating speed on BMI and waist  
12  
13 179 circumference, we utilized fixed-effects models with these factors as the dependent  
14  
15 180 variables. The exposure variables were the 7 lifestyle habit items, and the covariates  
16  
17 181 were the use of anti-diabetic medication, age, and BMI or waist circumference in the  
18  
19 182 previous checkup. Sex and other covariates that remained unchanged throughout the  
20  
21 183 observation period were adjusted as fixed effects. The Hausman test was employed  
22  
23 184 for model selection; the *P*-value was below 0.001, which confirmed that the use of the  
24  
25 185 fixed-effects model was appropriate.

26  
27 186 All statistical analyses were conducted using Stata 13.1 (Stata Corp., College  
28  
29 187 Station, TX, USA). Statistical significance was set at *P* < 0.05.

30  
31 188

## 32 189 **Results**

33  
34 190 We identified 92,363 individuals from 303,361 person-months who had been  
35  
36 191 diagnosed with type 2 diabetes and had health checkup data for the period between  
37  
38 192 January 2005 and June 2013. After excluding cases with missing data in BMI and the  
39  
40 193 lifestyle habit items, the sample for analysis comprised 59,717 individuals from  
41  
42 194 129,978 person-months. The claims data and health checkup data that could be linked  
43  
44 195 for analysis covered the period from February 2008 to June 2013.

45  
46 196 The distribution of baseline characteristics according to eating speed is  
47  
48 197 presented in Table 1. The slow-eating group had a significantly higher proportion of  
49  
50 198 women (44.4%), lower mean BMI (22.3±4.0), lower proportion of obese individuals  
51  
52 199 (21.5%), smaller mean waist circumference (80.1±10.6 cm), lower alcohol  
53  
54 200 consumption frequency (every day: 22.8%; occasionally: 27.5%; rarely or never:  
55  
56 201 49.7%), and lower proportion of habitual smokers (27.3%) when compared with the

1  
2  
3 202 other 2 groups (all:  $P < 0.001$ ). In contrast, the fast-eating group had a significantly  
4  
5 203 lower proportion of women (27.3%,  $P < 0.001$ ), but a significantly higher mean BMI  
6  
7 204 ( $25.0 \pm 4.4$ ,  $P < 0.001$ ), higher proportion of obese individuals (44.8%,  $P < 0.001$ ), and  
8  
9 205 larger mean waist circumference ( $86.8 \pm 11.1$  cm,  $P < 0.001$ ).

10  
11 206 The mean number (and standard deviation) of health checkups among the 59,171  
12  
13 207 subjects used in the panel data analysis was 1.9 (1.1). The distribution of subjects  
14  
15 208 (and percentage of all subjects) according to the number of health checkups  
16  
17 209 undergone during the study period was as follows: 21,805 subjects (36.5%) with 1  
18  
19 210 checkup, 17,694 (29.6%) subjects with 2 checkups, 12,075 (20.2%) subjects with 3  
20  
21 211 checkups, 4,524 (7.6%) subjects with 4 checkups, 3,248 (5.4%) subjects with 5  
22  
23 212 checkups, and 371 (0.6%) subjects with 6 checkups. Table 2 shows the changes in  
24  
25 213 eating speed across these checkups according to the different baseline eating speeds.  
26  
27 214 Approximately half (51.9%) of the subjects exhibited changes in eating speed from  
28  
29 215 baseline during the study period. The results showed that 171 subjects (0.29%)  
30  
31 216 changed from being fast eaters to slow eaters, whereas 92 subjects (0.15%) changed  
32  
33 217 from being slow eaters to fast eaters.

34  
35 218 Table 3 shows the estimated odds ratios (ORs) of the various determinants of  
36  
37 219 obesity derived from the generalized estimating equation model. All eating habit  
38  
39 220 items, alcohol consumption frequency, sleep adequacy, and obesity status in the  
40  
41 221 previous checkup were significantly associated with obesity. When compared with the  
42  
43 222 fast-eating group, the slower eating speeds were significantly associated with reduced  
44  
45 223 ORs for obesity (normal: 0.71; slow: 0.58;  $P < 0.001$ ). The results also showed that  
46  
47 224 reduced alcohol consumption frequency was significantly associated with higher ORs  
48  
49 225 for obesity (occasionally: 1.18; rarely or never: 1.22;  $P < 0.001$ ). In addition,  
50  
51 226 adequate sleep was significantly associated with a lower OR for obesity (0.94,  $P =$   
52  
53 227 0.007). Habitual smoking was also significantly associated with the outcome.

54  
55 228 The estimated coefficients of the various determinants of changes in BMI are  
56  
57 229 presented in Table 4. Eating speed (normal:  $P < 0.001$ ; slow:  $P < 0.001$ ), eating

1  
2  
3 230 dinner within 2 hours before sleeping for 3 times or more per week ( $P < 0.001$ ),  
4 231 snacking after dinner for 3 times or more per week ( $P < 0.001$ ), BMI in the previous  
5 232 checkup ( $P < 0.001$ ), alcohol consumption frequency (occasionally:  $P < 0.001$ ; rarely  
6 233 or never:  $P = 0.002$ ), and age ( $P = 0.008$ ) were significantly associated with changes  
7 234 in BMI. With the exception of inadequate sleep, habitual smoking, age, and BMI in  
8 235 the previous checkup, the coefficients of all the other factors were negative. This  
9 236 indicated that eating slower, not eating dinner within 2 hours before sleeping, not  
10 237 snacking after dinner, and drinking infrequently were associated with reductions in  
11 238 BMI. Skipping breakfast 3 times or more per week, habitual smoking, and the use of  
12 239 anti-diabetic medication were not significantly associated with BMI.

13 240 Table 5 presents the results of eating speed on waist circumference from the  
14 241 fixed-effects model analysis. When compared with fast eaters, normal-speed eaters  
15 242 and slow eaters had reductions in waist circumference of 0.21 cm and 0.41 cm,  
16 243 respectively ( $P < 0.001$ ).

17 244

## 18 245 **Discussion**

19 246 This study analyzed Japanese men and women who had undergone specific health  
20 247 checkups regardless of obesity status. Possible lifestyle-related determinants of  
21 248 obesity were identified using questionnaire items from the Standard Health Checkup  
22 249 and Counseling Guidance Program.<sup>12</sup> We examined 6-year panel data to determine  
23 250 how changes in eating speed and other lifestyle habits affect obesity and BMI. The  
24 251 main results indicated that decreases in eating speeds can lead to reductions in  
25 252 obesity and BMI after controlling for the covariates. In addition, the study found that  
26 253 the cessation of eating after dinner or within 2 hours before sleeping would also have  
27 254 a similar effect on reducing excess body weight.

28 255 A strength of this study is the utilization of large-scale panel data from  
29 256 approximately 60,000 diabetes patients spanning a 6-year observation period. The use  
30 257 of panel data increases the accuracy of estimates when compared with conventional

1  
2  
3 258 cross-sectional and time series data.<sup>17</sup> Panel data also enable adjustments of the  
4  
5 259 unobservable differences between study subpopulations, thereby facilitating analyses  
6  
7 260 of the effects of behavioral changes in subjects. Another strength of this study is the  
8  
9 261 incorporation of data on lifestyle habits, such as eating, sleeping, and smoking. By  
10  
11 262 analyzing the associations between these habits and obesity, our study was able to  
12  
13 263 quantify the possible effects of changes in these habits on obesity.

14  
15 264 The major finding of this study is that changes in eating speed can affect  
16  
17 265 obesity, BMI, and waist circumference. The control of eating speed may therefore be  
18  
19 266 a possible means of regulating body weight and preventing obesity, which in turn  
20  
21 267 reduces the risk of developing noncommunicable diseases. Eating quickly is  
22  
23 268 associated with impaired glucose tolerance and insulin resistance,<sup>18,19</sup> and is a known  
24  
25 269 risk factor for diabetes through increases in body weight.<sup>20</sup> Other studies have also  
26  
27 270 reported associations between eating quickly and increased BMI, indicating that  
28  
29 271 eating speed is a contributing factor for obesity.<sup>7,8,21-26</sup> A possible reason for this  
30  
31 272 association is that fast eaters may continue to eat until they feel full despite having  
32  
33 273 already consumed an adequate amount of calories, and the combined effect of eating  
34  
35 274 quickly and overeating may contribute to weight gain.<sup>27</sup> In contrast, eating slowly  
36  
37 275 may help to increase feelings of satiety before an excessive amount of food is  
38  
39 276 ingested.<sup>28-30</sup> A prospective study of schoolgirls found that the reduction of eating  
40  
41 277 speed was able to suppress weight gain and prevent obesity.<sup>31</sup> The findings of these  
42  
43 278 studies are consistent with those of our analysis.

44  
45 279 In addition to BMI-based definitions of obesity, waist circumference-based  
46  
47 280 definitions of abdominal obesity have also become increasingly important in recent  
48  
49 281 years. Cerhan *et al.* proposed that assessments of waist circumference should  
50  
51 282 accompany assessments of BMI.<sup>32</sup> As a supplementary analysis, we employed a fixed-  
52  
53 283 effects model to examine the effects of changes in eating speed on waist  
54  
55 284 circumference in our subjects. The results showed that when compared with fast  
56  
57 285 eaters, normal-speed eaters and slow eaters had reductions in waist circumference of

1  
2  
3 286 0.21 cm and 0.41 cm, respectively ( $P < 0.001$ ). These results support our findings of  
4  
5 287 the effects of changes in eating speed on obesity.

6  
7 288 Our results also indicated that frequently eating dinner within 2 hours before  
8  
9 289 sleeping, snacking after dinner, and skipping breakfast contribute to the development  
10  
11 290 of obesity. Previous studies have identified eating after dinner and within 2 hours  
12  
13 291 before sleeping as risk factors of metabolic syndrome.<sup>7</sup> This supports our findings  
14  
15 292 that the cessation of these habits can help to reduce obesity and BMI. Skipping  
16  
17 293 breakfast has also been shown to be associated with excess weight and obesity, and is  
18  
19 294 a risk factor of metabolic syndrome.<sup>7,9,33</sup> Our generalized estimating equation model  
20  
21 295 revealed that consistently eating breakfast can reduce obesity, which also  
22  
23 296 corroborates the findings of previous studies. However, our fixed-effects model  
24  
25 297 showed that consistently eating breakfast did not affect changes in BMI. It has been  
26  
27 298 reported that skipping breakfast over a long-period is associated with high BMI and  
28  
29 299 elevated cardiometabolic risks.<sup>34</sup> Consistently eating breakfast may therefore help to  
30  
31 300 control obesity and BMI.

32  
33 301 The association between daily alcohol consumption and obesity remains  
34  
35 302 controversial. While several studies have identified this lifestyle habit as a risk factor  
36  
37 303 of metabolic syndrome,<sup>7,35</sup> others have reported an inverse association between the  
38  
39 304 frequency of alcohol consumption (given the same quantities of alcohol) and  
40  
41 305 obesity.<sup>36,37</sup> In our study, the frequency of alcohol consumption was found to be  
42  
43 306 inversely associated with obesity, but positively associated with BMI and waist  
44  
45 307 circumference. In order to clarify this apparent disparity, further analyses of alcohol  
46  
47 308 consumption should be conducted with consideration to the overall quantities of  
48  
49 309 alcohol consumed.

50  
51 310 Studies have also found associations between short sleep durations and BMI  
52  
53 311 increases, and that poor-quality sleep is associated with metabolic syndrome.<sup>38-40</sup> Our  
54  
55 312 analysis produced contradictory results in that a change from adequate sleep to  
56  
57 313 inadequate sleep would reduce BMI but increase obesity progression. Moreover, we

1  
2  
3 314 did not detect any significant association between sleep and waist circumference. A  
4  
5 315 recent study has shown that unstable sleep patterns may increase the quantity of food  
6  
7 316 intake,<sup>41</sup> and our findings therefore require further investigation. The lack of  
8  
9 317 association between habitual smoking and BMI or metabolic syndrome has been  
10  
11 318 reported in previous studies,<sup>7,42</sup> which corroborates our findings.

12  
13 319 This study has several limitations that should be considered. First, this study  
14  
15 320 utilized health checkup data from health insurance societies. As a result, the data may  
16  
17 321 not have included a large proportion of the insurance enrollees' dependents. In  
18  
19 322 particular, there was a relatively small proportion of older adults in our study  
20  
21 323 population. The results may therefore lack generalizability to other subpopulations.  
22  
23 324 Second, eating speed and the other lifestyle habits were self-assessed, and may  
24  
25 325 therefore be vulnerable to reporting bias. However, while the differences in  
26  
27 326 perceptions of eating and sleeping habits in standardized questionnaires have been  
28  
29 327 described,<sup>43</sup> Sasaki *et al.* reported that there was no difference between the eating  
30  
31 328 speeds assessed by study subjects or by friends of the subjects.<sup>25</sup> In addition, our  
32  
33 329 findings are consistent with those of a previous study that used objective measures of  
34  
35 330 eating speed and found that slower eating speeds were associated with greater weight  
36  
37 331 loss.<sup>30</sup> Thirdly, we did not include an analysis of physical exercise and energy intake,  
38  
39 332 which may be potential confounders. Nevertheless, a previous analysis has reported  
40  
41 333 that eating speed was associated with obesity regardless of the level of physical  
42  
43 334 activity.<sup>26</sup> Other studies have also reported similar associations between eating speed  
44  
45 335 and BMI given similar overall food intake, which corroborates our findings.<sup>24,25</sup>  
46  
47 336 Therefore, these 2 factors are unlikely to be confounders in this study despite their  
48  
49 337 association with BMI. Finally, the sample comprised relatively health-conscious  
50  
51 338 individuals who voluntarily participated in health checkups. The findings may  
52  
53 339 therefore have limited applicability to less health-conscious people.

54  
55 340 Many studies have shown that eating habits are associated with BMI and weight  
56  
57 341 gain.<sup>7,8,18-31</sup> However, this study utilized panel data to show that changes in eating

1  
2  
3 342 habits have a strong relationship with obesity, BMI, and waist circumference. These  
4  
5 343 findings indicate that weight loss can be supported through the reduction of eating  
6  
7 344 speed, the cessation of eating dinner within 2 hours before sleeping, the cessation of  
8  
9 345 snacking after dinner, and consistently having breakfast.

10  
11 346

12  
13 347 **Conclusions**

14  
15 348 Changes in eating habits can affect obesity, BMI, and waist circumference.

16  
17 349 Interventions aimed at altering eating habits, such as education initiatives and

18  
19 350 programs to reduce eating speed, may be useful in preventing obesity and reducing

20  
21 351 the risk of noncommunicable diseases.

22  
23 352

1  
2  
3 353 **Funding:**

4 354 This work was supported by Grant-in-Aid for Health Sciences Research by the  
5  
6 355 Ministry of Health, Labour and Welfare of Japan (Grant Number H29-Seisaku-Shitei-  
7  
8 356 010)  
9

10 357

11  
12 358 **Competing interests:**

13  
14 359 No potential conflicts of interest relevant to this article were reported.  
15

16 360

17  
18 361 **Author contributions:**

19  
20 362 YH contributed to data analysis and interpretation, and drafting of the manuscript. HF  
21  
22 363 contributed to the study concept, data design and interpretation, and drafting of the  
23  
24 364 manuscript.  
25

26 365

27  
28 366 **Ethics approval:**

29  
30 367 This study was approved by the ethics committee of the Japan Medical Data Center  
31  
32 368 (No. 18-09-2014).  
33

34 369

35  
36 370 **Data sharing statement:**

37  
38 371 No additional data are available.  
39

40  
41 372  
42  
43  
44  
45  
46  
47  
48  
49  
50  
51  
52  
53  
54  
55  
56  
57  
58  
59  
60



## 373 **References**

- 374 1. World Health Organization. Media centre, obesity and overweight.  
375 <http://www.who.int/mediacentre/factsheets/fs311/en/> [Accessed: August 19, 2017]
- 376 2. Oh SW, Shin SA, Yun YH, *et al.* Cut-off point of BMI and obesity-related  
377 comorbidities and mortality in middle-aged Koreans. *Obes Res* 2004; 12: 2031-40.
- 378 3. Yoon KH, Lee JH, Kim JW, *et al.* Epidemic obesity and type 2 diabetes in Asia,  
379 *Lancet* 2006; 368: 1681-8.
- 380 4. Huxley R, Mendis S, Zheleznyakov E, *et al.* Body mass index, waist circumference  
381 and waist:hip ratio as predictors of cardiovascular risk. *Eur J Clin Nutr* 2010; 64:  
382 16-22.
- 383 5. Matsushita Y, Takahashi Y, Mizoue T, *et al.* Overweight and obesity trends among  
384 Japanese adults: a 10-year follow-up of the JPHC Study. *Int J Obes* 2008; 32: 1861-7.
- 385 6. Ministry of Health, Labour and Welfare. Annual Health, Labour and Welfare Report  
386 2013-2014. Toward the Realization of a Society of Health and Longevity: The First  
387 Year of Health and Prevention.  
388 <http://www.mhlw.go.jp/wp/hakusyo/kousei/14/backdata/> [Accessed: August 19, 2017]
- 389 7. Ashizawa E, Katano S, Harada A, *et al.* Exploring the link between standard lifestyle  
390 questionnaires administered during specific medical check-ups and incidence of  
391 metabolic syndrome in Chiba Prefecture. *Nihon Koshu Eisei Zasshi* 2014; 61(4): 176-  
392 85.
- 393 8. Zhu B, Haruyama Y, Muto T, *et al.* Association Between Eating Speed and Metabolic  
394 Syndrome in a Three-Year Population-Based Cohort Study. *J Epidemiol* 2015; 25:  
395 332-6.
- 396 9. Horikawa C, Kodama S, Yachi Y, *et al.* Skipping breakfast and prevalence of  
397 overweight and obesity in Asian and Pacific regions: A meta-analysis. *Prev Med*  
398 2011; 53: 260-7.
- 399 10. Ferrie JE, Kivimäki M, Akbaraly TN, *et al.* Change in Sleep Duration and Type 2  
400 Diabetes: The Whitehall II Study. *Diabetes Care* 2015; 38: 1467-72.
- 401 11. Tamura T, Kimura Y. Specific health checkups in Japan: The present situation

- 1  
2  
3 402 analyzed using 5-year statistics and the future. *Biomed Eng Lett* 2015; 5: 22-8.
- 4  
5 403 12. Health Service Bureau, the Ministry of Health, Labour and Welfare. Standard Health  
6  
7 404 Checkup and Counseling Guidance Program (Revised Version).  
8  
9 405 [http://www.mhlw.go.jp/stf/seisakunitsuite/bunya/kenkou\\_iryuu/kenkou/seikatsu/](http://www.mhlw.go.jp/stf/seisakunitsuite/bunya/kenkou_iryuu/kenkou/seikatsu/)  
10  
11 406 [Accessed: August 19, 2017]
- 12  
13 407 13. Yoshiike N, Nishi N, Matsushima S, *et al.* Relationship between the severity of  
14  
15 408 obesity based on body mass index and the risk factors for diabetes, hypertension, and  
16  
17 409 hyperglycemia: a multicenter epidemiological study. *Obesity Research* 2000; 6: 4-17.  
18  
19 410 [in Japanese]
- 20  
21 411 14. Waki K, Noda M, Sasaki S, *et al.* Alcohol consumption and other risk factors for  
22  
23 412 self-reported diabetes among middle-aged Japanese: a population-based prospective  
24  
25 413 study in the JPHC study cohort I. *Diabetic Medicine* 2005; 22(3): 323-31.
- 26  
27 414 15. WHO Expert Consultation. Public health appropriate body-mass index for Asian  
28  
29 415 populations and its implications for policy and intervention strategies. *Lancet* 2004;  
30  
31 416 363: 157-63.
- 32  
33 417 16. Saito Y, Shirai K, Nakamura T, *et al.* Diagnostic criteria for obesity 2011. *Obesity*  
34  
35 418 *Research* 2011; 7: s1-s78 [in Japanese]
- 36  
37 419 17. Kitamura Y. Meanings of panel data and its use. *The Japanese Journal of Labour*  
38  
39 420 *Studies* 2006; 551: 6-16 [in Japanese]
- 40  
41 421 18. Totsuka K, Maeno T, Saito K, *et al.* Self-reported fast eating is a potent predictor of  
42  
43 422 development of impaired glucose tolerance in Japanese men and women: Tsukuba  
44  
45 423 Medical Center Study. *Diabetes Res Clin Pract* 2011; 94: e72-e74.
- 46  
47 424 19. Otsuka R, Tamakoshi K, Yatsuya H, *et al.* Eating fast leads to insulin resistance:  
48  
49 425 findings in middle-aged Japanese men and women. *Prev Med* 2008; 46: 154-9.
- 50  
51 426 20. Sakurai M, Nakamura K, Miura K, *et al.* Self-reported speed of eating and 7-year  
52  
53 427 risk of type2 diabetes mellitus in middle-aged Japanese men. *Metabolism* 2012; 61:  
54  
55 428 1566-71.
- 56  
57 429 21. Yamane M, Ekumi D, Kataoka K, *et al.* Relationships between eating quickly and  
58  
59 430 weight gain in Japanese university students: a longitudinal study. *Obesity* 2014; 22:

- 1  
2  
3 431 2262-6.  
4  
5 432 22. Tanihara S, Imatoh T, Miyazaki M, *et al.* Retrospective longitudinal study on the  
6  
7 433 relationship between 8-year weight change and current eating speed. *Appetite* 2011;  
8  
9 434 57: 179-83.  
10  
11 435 23. Oya J, Nakagami T, Sasaki S, *et al.* Characteristics of nutritional intake and exercise  
12  
13 436 habits according to classifications of the Standard Health Checkup and Counseling  
14  
15 437 Guidance Program: an analysis of Kurihara Lifestyle Cohort Study data. *The Journal*  
16  
17 438 *of Metabolism and Clinical Nutrition* 2011; 14: 25-32. [in Japanese]  
18  
19 439 24. Otsuka R, Tamakoshi K, Yatsuya H, *et al.* Eating fast leads to obesity Findings based  
20  
21 440 on self-administered questionnaires among middle-aged Japanese men and women. *J*  
22  
23 441 *Epidemiol* 2006; 16: 117-24.  
24  
25 442 25. Sasaki S, Katagiri A, Tsuji T, *et al.* Self-reported rate of eating correlates with body  
26  
27 443 mass index in 18-y-old Japanese women. *Int J Obes Relat Metab Disord* 2003; 27:  
28  
29 444 1405-10.  
30  
31 445 26. Momose Y, Une H, Hayashi M, *et al.* Habit of eating quickly is independently related  
32  
33 446 with overweight among Japanese rural residents aged 40-79 years. *Journal of the*  
34  
35 447 *Japanese Association of Rural Medicine* 2010; 58; 533-40. [in Japanese]  
36  
37 448 27. Maruyama K, Sato S, Ohira T, *et al.* The joint impact on being overweight of self  
38  
39 449 reported behaviours of eating quickly and eating until full: cross sectional study.  
40  
41 450 *BMJ* 2008; 337: a2002.  
42  
43 451 28. Andrade AM, Greene GW, Melanson KJ. Eating slowly led to decreases in energy  
44  
45 452 intake within meals in healthy women. *J Am Diet Assoc* 2008; 108: 1186-91.  
46  
47 453 29. Martin CK, Anton SD, Walden H, *et al.* Slower eating rate reduces the food intake of  
48  
49 454 men, but not women: Implications for behavioral weight control. *Behav Res Ther*  
50  
51 455 2007; 45: 2349-59.  
52  
53 456 30. Spiegel TA, Wadden TA, Foster GD. Objective measurement of eating rate during  
54  
55 457 behavioral treatment of obesity. *Behav Ther* 1991; 22: 61-7.  
56  
57 458 31. Ochiai H, Shirasawa T, Ohtsu T, *et al.* The impact of eating quickly on  
58  
59 459 anthropometric variables among schoolgirls: A prospective cohort study in Japan.  
60

- 1  
2  
3 460 *Eur J Public Health* 2014; 24: 691-5.
- 4  
5 461 32. Cerhan JR, Moore SC, Jacobs EJ, *et al.* A pooled analysis of waist circumference and  
6  
7 462 mortality in 650,000 adults. *Mayo Clinic Proceedings* 2014; 89(3): 335-45.
- 8  
9 463 33. Odegaard AO, Jacobs DR Jr, Steffen LM, *et al.* Breakfast frequency and development  
10  
11 464 of metabolic risk. *Diabetes Care* 2013; 36: 3100-6.
- 12  
13 465 34. Smith KJ, Gall SL, McNaughton SA, *et al.* Skipping breakfast: longitudinal  
14  
15 466 associations with cardiometabolic risk factors in the Childhood Determinants of  
16  
17 467 Adult Health Study. *Am J Clin Nutr* 2010; 92: 1316-25.
- 18  
19 468 35. Dorn JM, Hovey K, Muti P, *et al.* Alcohol drinking patterns differentially affect  
20  
21 469 central adiposity as measured by abdominal height in women and men. *J Nutr* 2003;  
22  
23 470 133: 2655-62.
- 24  
25 471 36. Tolstrup JS, Halkjaer J, Heitmann BL, *et al.* Alcohol drinking frequency in relation  
26  
27 472 to subsequent changes in waist circumference. *Am J Clin Nutr* 2008; 87: 957-63.
- 28  
29 473 37. Tolstrup JS, Heitmann BL, Tjønneland AM, *et al.* The relation between drinking  
30  
31 474 pattern and body mass index and waist and hip circumference. *Int J Obes* 2005; 29:  
32  
33 475 490-7.
- 34  
35 476 38. Lee J, Choi YS, Jeong YJ, *et al.* Poor-quality sleep is associated with metabolic  
36  
37 477 syndrome in Korean adults. *Tohoku J Exp Med* 2013; 231: 281-91.
- 38  
39 478 39. Nishiura C, Hashimoto H. A 4-year study of the association between short sleep  
40  
41 479 duration and change in body mass index in Japanese male workers. *J Epidemiol*  
42  
43 480 2010; 20: 385-90.
- 44  
45 481 40. Taheri S, Lin L, Austin D, *et al.* Short sleep duration is associated with reduced  
46  
47 482 leptin, elevated ghrelin, and increased body mass index. *PLoS Med* 2004; 1: e62.
- 48  
49 483 41. Lundahl A, Nelson T. Sleep and food intake: A multisystem review of mechanisms in  
50  
51 484 children and adults. *J Health Psychol* 2015; 20: 794-805.
- 52  
53 485 42. Sogabe N, Maruyama R, Sato K, *et al.* Relationships between smoking and eating  
54  
55 486 habits or behavior in male students. *Nihon Koshu Eisei Zasshi* 2008;55:30-6. [in  
56  
57 487 Japanese]

1  
2  
3  
4  
5  
6  
7  
8  
9  
10  
11  
12  
13  
14  
15  
16  
17  
18  
19  
20  
21  
22  
23  
24  
25  
26  
27  
28  
29  
30  
31  
32  
33  
34  
35  
36  
37  
38  
39  
40  
41  
42  
43  
44  
45  
46  
47  
48  
49  
50  
51  
52  
53  
54  
55  
56  
57  
58  
59  
60

488 43. Yamauchi T, Takaki M, Tonai M. Images and recognition about "eating quickly". *The*  
489 *Journal of Japan Society for Health Care Management* 2003; 4(2): 311-318. [in  
490 Japanese]  
491

For peer review only

492 **Table 1. Distribution of baseline characteristics according to eating speed**

|                                                                   | Eating Speed         |                        |                     | <i>P</i>            |
|-------------------------------------------------------------------|----------------------|------------------------|---------------------|---------------------|
|                                                                   | Fast<br>(n = 22,070) | Normal<br>(n = 33,455) | Slow<br>(n = 4,192) |                     |
| Women                                                             | 6,023<br>(27.3%)     | 12,213<br>(36.5%)      | 1,861<br>(44.4%)    | <0.001 <sup>a</sup> |
| Age                                                               | 46.6 [10.4]          | 48.1 [10.6]            | 46.5 [11.7]         | <0.001 <sup>b</sup> |
| Use of anti-diabetic medications                                  | 13,648<br>(61.8%)    | 20,074<br>(60.0%)      | 2,525<br>(60.2%)    | <0.001 <sup>a</sup> |
| BMI, kg/m <sup>2</sup>                                            | 25.0 [4.4]           | 23.4 [3.9]             | 22.3 [4.0]          | <0.001 <sup>b</sup> |
| Obese (BMI ≥25)                                                   | 9,884<br>(44.8%)     | 9,886<br>(29.6%)       | 901<br>(21.5%)      | <0.001 <sup>a</sup> |
| Waist circumference (cm)                                          | 86.8 [11.1]          | 82.8 [10.4]            | 80.1 [10.6]         | <0.001 <sup>b</sup> |
| Eating dinner within 2 hours<br>before sleeping ≥3 times per week | 9,546<br>(43.3%)     | 11,161<br>(33.4%)      | 1,541<br>(36.8%)    | <0.001 <sup>a</sup> |
| Snacking after dinner ≥3 times<br>per week                        | 4,247<br>(19.2%)     | 4,851<br>(14.5%)       | 809<br>(19.3%)      | <0.001 <sup>a</sup> |
| Skipping breakfast ≥3 times per<br>week                           | 4,599<br>(20.8%)     | 5,542<br>(16.6%)       | 794<br>(18.9%)      | <0.001 <sup>a</sup> |
| Alcohol consumption                                               |                      |                        |                     |                     |
| Every day                                                         | 5,695<br>(25.8%)     | 8,810<br>(26.3%)       | 955<br>(22.8%)      | <0.001 <sup>a</sup> |
| Occasionally                                                      | 7,233<br>(32.8%)     | 10,398<br>(31.1%)      | 1,152<br>(27.5%)    | <0.001 <sup>a</sup> |
| Rarely or never                                                   | 9,142<br>(41.4%)     | 14,247<br>(42.6%)      | 2,085<br>(49.7%)    | <0.001 <sup>a</sup> |
| Inadequate sleep                                                  | 11,236<br>(50.9%)    | 15,018<br>(44.9%)      | 1,954<br>(46.6%)    | <0.001 <sup>a</sup> |
| Habitual smoker                                                   | 7,140<br>(32.4%)     | 10,240<br>(30.6%)      | 1,146<br>(27.3%)    | <0.001 <sup>a</sup> |

493 <sup>a</sup>  $\chi^2$  test494 <sup>b</sup> One-way analysis of variance495 Values for number of checkups, age, and BMI are presented as mean [standard deviation]. All  
496 other values are presented as number of subjects (proportion of each eating-speed group).

497 Abbreviation: BMI, body mass index.

498 **Table 2. Patterns of changes in eating speed during the intermediate and final phases of**  
 499 **analysis according to the different baseline eating speeds**

| Intermediate Status | Final Status        | Baseline Status |               |             |
|---------------------|---------------------|-----------------|---------------|-------------|
|                     |                     | Fast            | Normal        | Slow        |
| Fast                | Fast                | 5018 (8.4%)     | 605 (1.0%)    | 23 (0.0%)   |
| Fast                | Normal              | 597 (1.0%)      | 421 (0.7%)    | 11 (0.0%)   |
| Fast                | Slow                | 22 (0.0%)       | 4 (0.0%)      | 4 (0.0%)    |
| Normal              | Fast                | 715 (1.2%)      | 825 (1.4%)    | 15 (0.0%)   |
| Normal              | Normal              | 921 (1.5%)      | 8451 (14.2%)  | 259 (0.4%)  |
| Normal              | Slow                | 11 (0.0%)       | 254 (0.4%)    | 115 (0.2%)  |
| Slow                | Fast                | 44 (0.1%)       | 28 (0.0%)     | 9 (0.0%)    |
| Slow                | Normal              | 46 (0.1%)       | 447 (0.7%)    | 244 (0.4%)  |
| Slow                | Slow                | 16 (0.0%)       | 239 (0.4%)    | 874 (1.5%)  |
| N.A.                | Fast <sup>a</sup>   | 5839 (9.8%)     | 1322 (2.2%)   | 30 (0.1%)   |
| N.A.                | Normal <sup>a</sup> | 1155 (1.9%)     | 7749 (13.0%)  | 350 (0.6%)  |
| N.A.                | Slow <sup>a</sup>   | 32 (0.1%)       | 417 (0.7%)    | 800 (1.3%)  |
| N.A.                | N.A. <sup>b</sup>   | 7654 (12.8%)    | 12693 (21.3%) | 1458 (2.4%) |

500 Some subjects may report different eating speeds throughout their checkups during the study  
 501 period. In addition, subjects who underwent 4 to 6 checkups may have different reported  
 502 eating speeds during their intermediate phase (2nd to 5th checkups); in these subjects, the  
 503 eating speeds during the intermediate phase were categorized in the following order of  
 504 priority: slow, normal, and fast. For example, a subject with both slow and fast eating speeds  
 505 reported in the 2nd to 5th checkups would be reflected as having a slow eating speed during  
 506 the intermediate phase.

507 <sup>a</sup> Subjects with only 2 eating speed measurements during the study period.

508 <sup>b</sup> Subjects with only 1 eating speed measurement during the study period.

509  
 510

511 **Table 3. Estimated odds ratios of the determinants of obesity derived from the**  
 512 **generalized estimating equation model**

|                                                                      | <b>Odds Ratio</b> | <b>95% Confidence Intervals</b> | <b>P</b> |
|----------------------------------------------------------------------|-------------------|---------------------------------|----------|
| Eating speed                                                         |                   |                                 |          |
| Fast                                                                 | REF               |                                 |          |
| Normal                                                               | 0.71              | 0.68, 0.75                      | <0.001   |
| Slow                                                                 | 0.58              | 0.54, 0.63                      | <0.001   |
| Eating dinner within 2 hours before sleeping $\geq 3$ times per week |                   |                                 |          |
| Yes                                                                  | REF               |                                 |          |
| No                                                                   | 0.90              | 0.86, 0.94                      | <0.001   |
| Snacking after dinner $\geq 3$ times per week                        |                   |                                 |          |
| Yes                                                                  | REF               |                                 |          |
| No                                                                   | 0.85              | 0.80, 0.90                      | <0.001   |
| Skipping breakfast $\geq 3$ times per week                           |                   |                                 |          |
| Yes                                                                  | REF               |                                 |          |
| No                                                                   | 0.92              | 0.87, 0.97                      | 0.004    |
| Alcohol consumption                                                  |                   |                                 |          |
| Every day                                                            | REF               |                                 |          |
| Occasionally                                                         | 1.18              | 1.12, 1.25                      | <0.001   |
| Rarely or never                                                      | 1.22              | 1.16, 1.29                      | <0.001   |
| Inadequate sleep                                                     |                   |                                 |          |
| Yes                                                                  | REF               |                                 |          |
| No                                                                   | 0.94              | 0.90, 0.98                      | 0.007    |
| Habitual smoker                                                      |                   |                                 |          |
| Yes                                                                  | REF               |                                 |          |
| No                                                                   | 1.10              | 1.05, 1.15                      | <0.001   |
| Use of anti-diabetic medication                                      |                   |                                 |          |
| No                                                                   | REF               |                                 |          |
| Yes                                                                  | 1.02              | 0.98, 1.07                      | 0.293    |
| Age                                                                  | 1.00              | 1.00, 1.00                      | 0.076    |
| Female                                                               | 0.66              | 0.63, 0.69                      | <0.001   |
| Obesity status in the previous checkup                               |                   |                                 |          |
| Not obese                                                            | REF               |                                 |          |
| Obese                                                                | 164.79            | 156.15, 173.91                  | <0.001   |

513



514 **Table 4. Estimated coefficients of the determinants of changes in BMI derived**  
 515 **from the fixed-effects model**

|                                                                      | <b>Coefficient</b> | <b>95%<br/>Confidence<br/>Intervals</b> | <b>P</b> |
|----------------------------------------------------------------------|--------------------|-----------------------------------------|----------|
| Eating speed                                                         |                    |                                         |          |
| Fast                                                                 | REF                |                                         |          |
| Normal                                                               | -0.07              | -0.10, -0.05                            | <0.001   |
| Slow                                                                 | -0.11              | -0.15, -0.06                            | <0.001   |
| Eating dinner within 2 hours before sleeping $\geq 3$ times per week |                    |                                         |          |
| Yes                                                                  | REF                |                                         |          |
| No                                                                   | -0.06              | -0.08, -0.04                            | <0.001   |
| Snacking after dinner $\geq 3$ times per week                        |                    |                                         |          |
| Yes                                                                  | REF                |                                         |          |
| No                                                                   | -0.08              | -0.11, -0.06                            | <0.001   |
| Skipping breakfast $\geq 3$ times per week                           |                    |                                         |          |
| Yes                                                                  | REF                |                                         |          |
| No                                                                   | 0.00               | -0.03, 0.04                             | 0.829    |
| Alcohol consumption                                                  |                    |                                         |          |
| Every day                                                            | REF                |                                         |          |
| Occasionally                                                         | -0.10              | -0.13, -0.06                            | <0.001   |
| Rarely or never                                                      | -0.18              | -0.22, -0.13                            | <0.001   |
| Inadequate sleep                                                     |                    |                                         |          |
| Yes                                                                  | REF                |                                         |          |
| No                                                                   | 0.03               | 0.01, 0.05                              | 0.001    |
| Habitual smoker                                                      |                    |                                         |          |
| Yes                                                                  | REF                |                                         |          |
| No                                                                   | 0.23               | 0.20, 0.27                              | 0.363    |
| Use of anti-diabetic medication                                      |                    |                                         |          |
| No                                                                   | REF                |                                         |          |
| Yes                                                                  | -0.12              | -0.14, -0.10                            | 0.069    |
| Age                                                                  | 0.08               | 0.07, 0.10                              | 0.008    |
| BMI in the previous checkup                                          | 0.09               | 0.07, 0.10                              | <0.001   |

516 Abbreviation: BMI, body mass index.

517

518 **Table 5. Estimated coefficients of the determinants of changes in waist**  
 519 **circumference derived from the fixed-effects model**

|                                                                         | <b>Coefficient</b> | <b>95%<br/>Confidence<br/>Intervals</b> | <b>P</b> |
|-------------------------------------------------------------------------|--------------------|-----------------------------------------|----------|
| Eating speed                                                            |                    |                                         |          |
| Fast                                                                    | REF                |                                         |          |
| Normal                                                                  | -0.21              | -0.30, -0.12                            | <0.001   |
| Slow                                                                    | -0.41              | -0.59, -0.22                            | <0.001   |
| Eating dinner within 2 hours before sleeping $\geq 3$<br>times per week |                    |                                         |          |
| Yes                                                                     | REF                |                                         |          |
| No                                                                      | -0.12              | -0.20, -0.04                            | 0.003    |
| Snacking after dinner $\geq 3$ times per week                           |                    |                                         |          |
| Yes                                                                     | REF                |                                         |          |
| No                                                                      | -0.2               | -0.29, -0.11                            | <0.001   |
| Skipping breakfast $\geq 3$ times per week                              |                    |                                         |          |
| Yes                                                                     | REF                |                                         |          |
| No                                                                      | 0.03               | -0.11, 0.16                             | 0.674    |
| Alcohol consumption                                                     |                    |                                         |          |
| Every day                                                               | REF                |                                         |          |
| Occasionally                                                            | -0.34              | -0.47, -0.20                            | <0.001   |
| Rarely or never                                                         | -0.47              | -0.65, -0.29                            | <0.001   |
| Inadequate sleep                                                        |                    |                                         |          |
| Yes                                                                     | REF                |                                         |          |
| No                                                                      | 0.07               | 0.00, 0.14                              | 0.053    |
| Habitual smoker                                                         |                    |                                         |          |
| Yes                                                                     | REF                |                                         |          |
| No                                                                      | 0.8                | 0.66, 0.95                              | <0.001   |
| Use of anti-diabetic medication                                         |                    |                                         |          |
| No                                                                      | REF                |                                         |          |
| Yes                                                                     | -0.32              | -0.41, -0.23                            | <0.001   |
| Age                                                                     | 0.27               | 0.24, 0.30                              | <0.001   |
| Waist circumference in the previous checkup                             | -0.11              | -0.12, -0.10                            | <0.001   |

520

STROBE Statement—checklist of items that should be included in reports of observational studies

|                              | Item No. | Recommendation                                                                                                                                                                                                                                                                                                                                                                                                                                                         | Page No.                        | Relevant text from manuscript |
|------------------------------|----------|------------------------------------------------------------------------------------------------------------------------------------------------------------------------------------------------------------------------------------------------------------------------------------------------------------------------------------------------------------------------------------------------------------------------------------------------------------------------|---------------------------------|-------------------------------|
| <b>Title and abstract</b>    | 1        | (a) Indicate the study’s design with a commonly used term in the title or the abstract                                                                                                                                                                                                                                                                                                                                                                                 | Page 1: Title                   |                               |
|                              |          | (b) Provide in the abstract an informative and balanced summary of what was done and what was found                                                                                                                                                                                                                                                                                                                                                                    | Page 2: Abstract                |                               |
| <b>Introduction</b>          |          |                                                                                                                                                                                                                                                                                                                                                                                                                                                                        |                                 |                               |
| Background/rationale         | 2        | Explain the scientific background and rationale for the investigation being reported                                                                                                                                                                                                                                                                                                                                                                                   | Page 4: Lines 72-77&Lines 84-86 |                               |
| Objectives                   | 3        | State specific objectives, including any prespecified hypotheses                                                                                                                                                                                                                                                                                                                                                                                                       | Page 4: Lines 90-92             |                               |
| <b>Methods</b>               |          |                                                                                                                                                                                                                                                                                                                                                                                                                                                                        |                                 |                               |
| Study design                 | 4        | Present key elements of study design early in the paper                                                                                                                                                                                                                                                                                                                                                                                                                | Page 5: Lines 111-120           |                               |
| Setting                      | 5        | Describe the setting, locations, and relevant dates, including periods of recruitment, exposure, follow-up, and data collection                                                                                                                                                                                                                                                                                                                                        | Page 4-5: Lines 95-109          |                               |
| Participants                 | 6        | (a) <i>Cohort study</i> —Give the eligibility criteria, and the sources and methods of selection of participants. Describe methods of follow-up<br><i>Case-control study</i> —Give the eligibility criteria, and the sources and methods of case ascertainment and control selection. Give the rationale for the choice of cases and controls<br><i>Cross-sectional study</i> —Give the eligibility criteria, and the sources and methods of selection of participants | Page 5: Lines 112-114           |                               |
|                              |          | (b) <i>Cohort study</i> —For matched studies, give matching criteria and number of exposed and unexposed<br><i>Case-control study</i> —For matched studies, give matching criteria and the number of controls per case                                                                                                                                                                                                                                                 | Not Applicable                  |                               |
| Variables                    | 7        | Clearly define all outcomes, exposures, predictors, potential confounders, and effect modifiers. Give diagnostic criteria, if applicable                                                                                                                                                                                                                                                                                                                               | Page 5-6: Lines 122-157         |                               |
| Data sources/<br>measurement | 8*       | For each variable of interest, give sources of data and details of methods of assessment (measurement). Describe comparability of assessment methods if there is more than one group                                                                                                                                                                                                                                                                                   | Page 4-5: Lines 95-109          |                               |
| Bias                         | 9        | Describe any efforts to address potential sources of bias                                                                                                                                                                                                                                                                                                                                                                                                              | Not Applicable                  |                               |
| Study size                   | 10       | Explain how the study size was arrived at                                                                                                                                                                                                                                                                                                                                                                                                                              | Not Applicable                  |                               |

Continued on next page

|                        |     |                                                                                                                                                                                                                    |                               |
|------------------------|-----|--------------------------------------------------------------------------------------------------------------------------------------------------------------------------------------------------------------------|-------------------------------|
| Quantitative variables | 11  | Explain how quantitative variables were handled in the analyses. If applicable, describe which groupings were chosen and why                                                                                       | Page 5-6: Lines 122-157       |
| Statistical methods    | 12  | (a) Describe all statistical methods, including those used to control for confounding                                                                                                                              | Page 7-8: Lines 159-179       |
|                        |     | (b) Describe any methods used to examine subgroups and interactions                                                                                                                                                | Not Applicable                |
|                        |     | (c) Explain how missing data were addressed                                                                                                                                                                        | Page 6: Lines 118-119         |
|                        |     | (d) <i>Cohort study</i> —If applicable, explain how loss to follow-up was addressed                                                                                                                                | Not Applicable                |
|                        |     | <i>Case-control study</i> —If applicable, explain how matching of cases and controls was addressed<br><i>Cross-sectional study</i> —If applicable, describe analytical methods taking account of sampling strategy | Not Applicable                |
|                        |     | (e) Describe any sensitivity analyses                                                                                                                                                                              | Not Applicable                |
| <b>Results</b>         |     |                                                                                                                                                                                                                    |                               |
| Participants           | 13* | (a) Report numbers of individuals at each stage of study—eg numbers potentially eligible, examined for eligibility, confirmed eligible, included in the study, completing follow-up, and analysed                  | Page 6: Lines 181-187         |
|                        |     | (b) Give reasons for non-participation at each stage                                                                                                                                                               | Not Applicable                |
|                        |     | (c) Consider use of a flow diagram                                                                                                                                                                                 | Not Applicable                |
| Descriptive data       | 14* | (a) Give characteristics of study participants (eg demographic, clinical, social) and information on exposures and potential confounders                                                                           | Page 20: Table 1              |
|                        |     | (b) Indicate number of participants with missing data for each variable of interest                                                                                                                                | Page 20: Lines 181-187        |
|                        |     | (c) <i>Cohort study</i> —Summarise follow-up time (eg, average and total amount)                                                                                                                                   | Page 20: Line 183-184         |
| Outcome data           | 15* | <i>Cohort study</i> —Report numbers of outcome events or summary measures over time                                                                                                                                | Page 20: Table 1              |
|                        |     | <i>Case-control study</i> —Report numbers in each exposure category, or summary measures of exposure                                                                                                               | Page 20: Table 1              |
|                        |     | <i>Cross-sectional study</i> —Report numbers of outcome events or summary measures                                                                                                                                 | Page 20: Table 1              |
| Main results           | 16  | (a) Give unadjusted estimates and, if applicable, confounder-adjusted estimates and their precision (eg, 95% confidence interval). Make clear which confounders were adjusted for and why they were included       | Page 21-22: Table 2 & Table 3 |
|                        |     | (b) Report category boundaries when continuous variables were categorized                                                                                                                                          | Page 7: Lines 145-157         |
|                        |     | (c) If relevant, consider translating estimates of relative risk into absolute risk for a meaningful time period                                                                                                   | Not Applicable                |

Continued on next page

1  
2  
3  
4  
5  
6  
7  
8  
9  
10  
11  
12  
13  
14  
15  
16  
17  
18  
19  
20  
21  
22  
23  
24  
25  
26  
27  
28  
29  
30  
31  
32  
33  
34  
35  
36  
37  
38  
39  
40  
41  
42  
43  
44  
45  
46  
47

|                          |    |                                                                                                                                                                            |                           |
|--------------------------|----|----------------------------------------------------------------------------------------------------------------------------------------------------------------------------|---------------------------|
| Other analyses           | 17 | Report other analyses done—eg analyses of subgroups and interactions, and sensitivity analyses                                                                             | Not Applicable            |
| <b>Discussion</b>        |    |                                                                                                                                                                            |                           |
| Key results              | 18 | Summarise key results with reference to study objectives                                                                                                                   | Page 9-10: Lines 221-229  |
| Limitations              | 19 | Discuss limitations of the study, taking into account sources of potential bias or imprecision. Discuss both direction and magnitude of any potential bias                 | Page 12-13: Lines 291-311 |
| Interpretation           | 20 | Give a cautious overall interpretation of results considering objectives, limitations, multiplicity of analyses, results from similar studies, and other relevant evidence | Page 10: Lines 239-252    |
| Generalisability         | 21 | Discuss the generalisability (external validity) of the study results                                                                                                      | Page 12: Lines 291-295    |
| <b>Other information</b> |    |                                                                                                                                                                            |                           |
| Funding                  | 22 | Give the source of funding and the role of the funders for the present study and, if applicable, for the original study on which the present article is based              | Page 14: Lines 324-326    |

\*Give information separately for cases and controls in case-control studies and, if applicable, for exposed and unexposed groups in cohort and cross-sectional studies.

**Note:** An Explanation and Elaboration article discusses each checklist item and gives methodological background and published examples of transparent reporting. The STROBE checklist is best used in conjunction with this article (freely available on the Web sites of PLoS Medicine at <http://www.plosmedicine.org/>, Annals of Internal Medicine at <http://www.annals.org/>, and Epidemiology at <http://www.epidem.com/>). Information on the STROBE Initiative is available at [www.strobe-statement.org](http://www.strobe-statement.org).
